# Supplementary material for: Lanthanoid coordination prompts unusually distorted pseudo-octahedral NiII coordination in heterodinuclear Ni–Ln complexes: synthesis, structure and understanding of magnetic behaviour through experiment and computation
Source: Royal Society of Chemistry journal article supplement (doi:10.1039/d3dt01387a), 2023-01-01
Supplement: d3dt01387a1.pdf [file d3dt01387a1.pdf]

## Supporting Information

### **Lanthanoid Coordination Prompts Unusually Distorted Pseudo-Octahedral Ni<sup>II</sup> Coordination in Heterodinuclear Ni-Ln Complexes: Synthesis, Structure, and Understanding of Magnetic Behaviour through Experiment**

Biswarup Dutta<sup>a</sup>, Thierry Guizouarn<sup>b</sup>, Fabrice Pointillart<sup>b</sup>, Kamil Kotrle<sup>c</sup>, Radovan Herchel<sup>c</sup>, Debashis Ray<sup>a,\*</sup>

\*E-mail: [dray@chem.iitkgp.ac.in](mailto:dray@chem.iitkgp.ac.in)

<sup>a</sup> *Department of Chemistry, Indian Institute of Technology, Kharagpur 721302, India*

<sup>b</sup> *Univ Rennes, CNRS, ISCR (Institut des Sciences Chimiques de Rennes) - UMR 6226, F-35000 Rennes, France.*

<sup>c</sup> *Department of Inorganic Chemistry, Faculty of Science, Palacký University, 17. listopadu 12, 77146 Olomouc, Czech Republic*

**Table S1** Crystallographic data and structure refinement details of 1–7

| Parameters                         | 1                                                                                   | 2                                                                                   | 3                                                                                   | 4                                                                                   |
|------------------------------------|-------------------------------------------------------------------------------------|-------------------------------------------------------------------------------------|-------------------------------------------------------------------------------------|-------------------------------------------------------------------------------------|
| Empirical formula                  | C <sub>30</sub> H <sub>29</sub> GdN <sub>5</sub> NiO <sub>13.5</sub> S <sub>2</sub> | C <sub>30</sub> H <sub>29</sub> TbN <sub>5</sub> NiO <sub>13.5</sub> S <sub>2</sub> | C <sub>30</sub> H <sub>29</sub> DyN <sub>5</sub> NiO <sub>13.5</sub> S <sub>2</sub> | C <sub>30</sub> H <sub>29</sub> HoN <sub>5</sub> NiO <sub>13.5</sub> S <sub>2</sub> |
| Formula weight                     | 956.13                                                                              | 957.32                                                                              | 961.33                                                                              | 964.15                                                                              |
| Temperature/K                      | 296.15                                                                              | 296.15                                                                              | 296.15                                                                              | 296.15                                                                              |
| Crystal system                     | monoclinic                                                                          | monoclinic                                                                          | monoclinic                                                                          | monoclinic                                                                          |
| Space group                        | P2 <sub>1</sub> /n                                                                  | P2 <sub>1</sub> /n                                                                  | P2 <sub>1</sub> /n                                                                  | P2 <sub>1</sub> /n                                                                  |
| a/Å                                | 9.1623(13)                                                                          | 9.202(5)                                                                            | 9.149(2)                                                                            | 9.1793(15)                                                                          |
| b/Å                                | 21.061(3)                                                                           | 20.938(14)                                                                          | 20.951(6)                                                                           | 21.010(4)                                                                           |
| c/Å                                | 18.972(3)                                                                           | 18.691(18)                                                                          | 18.866(5)                                                                           | 18.880(3)                                                                           |
| α/°                                | 90                                                                                  | 90                                                                                  | 90                                                                                  | 90                                                                                  |
| β/°                                | 92.083(11)                                                                          | 92.06(3)                                                                            | 92.069(8)                                                                           | 91.854(13)                                                                          |
| γ/°                                | 90                                                                                  | 90                                                                                  | 90                                                                                  | 90                                                                                  |
| Volume/Å <sup>3</sup>              | 3658.6(10)                                                                          | 3599(5)                                                                             | 3614.1(16)                                                                          | 3639.1(11)                                                                          |
| Z                                  | 4                                                                                   | 4                                                                                   | 4                                                                                   | 4                                                                                   |
| ρ <sub>calc</sub> /cm <sup>3</sup> | 1.733                                                                               | 1.765                                                                               | 1.764                                                                               | 1.756                                                                               |
| μ/mm <sup>-1</sup>                 | 2.496                                                                               | 2.66                                                                                | 2.76                                                                                | 2.861                                                                               |
| F(000)                             | 1900                                                                                | 1904                                                                                | 1908                                                                                | 1912                                                                                |
| Radiation                          | MoKα (λ = 0.71073)                                                                  |
| 2θ range for data collection/°     | 4.424 to 50.05                                                                      | 4.838 to 50.648                                                                     | 4.448 to 50.158                                                                     | 4.732 to 50.094                                                                     |
| Index ranges                       | -10 ≤ h ≤ 10, -25 ≤ k ≤ 25, -17 ≤ l ≤ 22                                            | -10 ≤ h ≤ 10, -24 ≤ k ≤ 24, -22 ≤ l ≤ 21                                            | -10 ≤ h ≤ 10, -24 ≤ k ≤ 24, -22 ≤ l ≤ 22                                            | -10 ≤ h ≤ 8, -24 ≤ k ≤ 25, -22 ≤ l ≤ 21                                             |
| Reflections collected              | 31250                                                                               | 32424                                                                               | 37922                                                                               | 23734                                                                               |
| Independent reflections            | 6463 [R <sub>int</sub> = 0.0234, R <sub>sigma</sub> = 0.0182]                       | 6569 [R <sub>int</sub> = 0.0305, R <sub>sigma</sub> = 0.0210]                       | 6415 [R <sub>int</sub> = 0.0571, R <sub>sigma</sub> = 0.0351]                       | 6439 [R <sub>int</sub> = 0.0248, R <sub>sigma</sub> = 0.0223]                       |
| Data/restraints/parameters         | 6463/0/482                                                                          | 6569/0/477                                                                          | 6415/0/482                                                                          | 6439/0/482                                                                          |
| Goodness-of-fit on F <sup>2</sup>  | 1.043                                                                               | 1.075                                                                               | 1.019                                                                               | 1.035                                                                               |
| Final R indexes [I > 2σ (I)]       | R <sub>1</sub> = 0.0230, wR <sub>2</sub> = 0.0697                                   | R <sub>1</sub> = 0.0264, wR <sub>2</sub> = 0.0659                                   | R <sub>1</sub> = 0.0298, wR <sub>2</sub> = 0.0830                                   | R <sub>1</sub> = 0.0237, wR <sub>2</sub> = 0.0609                                   |
| Final R indexes [all data]         | R <sub>1</sub> = 0.0251, wR <sub>2</sub> = 0.0716                                   | R <sub>1</sub> = 0.0349, wR <sub>2</sub> = 0.0721                                   | R <sub>1</sub> = 0.0393, wR <sub>2</sub> = 0.0894                                   | R <sub>1</sub> = 0.0305, wR <sub>2</sub> = 0.0658                                   |

|                                                |            |            |            |            |
|------------------------------------------------|------------|------------|------------|------------|
| Largest diff. peak/hole / e<br>Å <sup>-3</sup> | 0.93/-0.36 | 0.79/-0.49 | 0.88/-0.57 | 0.82/-0.49 |
| CCDC No.                                       | 2163625    | 2163626    | 2163627    | 2163630    |

| Parameter                                                                    | 5                                                                                   | 6                                                                                   | 7                                                                                  |
|------------------------------------------------------------------------------|-------------------------------------------------------------------------------------|-------------------------------------------------------------------------------------|------------------------------------------------------------------------------------|
| Formula                                                                      | C <sub>30</sub> H <sub>29</sub> ErN <sub>5</sub> NiO <sub>13.5</sub> S <sub>2</sub> | C <sub>30</sub> H <sub>29</sub> YbN <sub>5</sub> NiO <sub>13.5</sub> S <sub>2</sub> | C <sub>30</sub> H <sub>29</sub> YN <sub>5</sub> NiO <sub>13.5</sub> S <sub>2</sub> |
| Formula weight                                                               | 965.645                                                                             | 971.04                                                                              | 887.25                                                                             |
| Temperature/K                                                                | 296.15                                                                              | 296.15                                                                              | 296.15                                                                             |
| Crystal system                                                               | monoclinic                                                                          | monoclinic                                                                          | monoclinic                                                                         |
| Space group                                                                  | P2 <sub>1</sub> /n                                                                  | P2 <sub>1</sub> /n                                                                  | P2 <sub>1</sub> /n                                                                 |
| a/Å                                                                          | 9.1700(7)                                                                           | 9.1814(6)                                                                           | 9.1686(15)                                                                         |
| b/Å                                                                          | 21.0171(14)                                                                         | 21.0515(16)                                                                         | 21.048(3)                                                                          |
| c/Å                                                                          | 18.8670(12)                                                                         | 18.8581(12)                                                                         | 18.887(2)                                                                          |
| α/°                                                                          | 90                                                                                  | 90                                                                                  | 90                                                                                 |
| β/°                                                                          | 92.063(5)                                                                           | 91.996(3)                                                                           | 92.029(10)                                                                         |
| γ/°                                                                          | 90                                                                                  | 90                                                                                  | 90                                                                                 |
| Volume/Å <sup>3</sup>                                                        | 3633.8(4)                                                                           | 3642.7(4)                                                                           | 3642.6(9)                                                                          |
| Z                                                                            | 4                                                                                   | 4                                                                                   | 4                                                                                  |
| ρ <sub>calc</sub> /cm <sup>3</sup>                                           | 1.763                                                                               | 1.784                                                                               | 1.616                                                                              |
| μ/mm <sup>-1</sup>                                                           | 2.998                                                                               | 3.256                                                                               | 2.288                                                                              |
| F(000)                                                                       | 1916                                                                                | 1940                                                                                | 1800                                                                               |
| Radiation                                                                    | MoKα (λ = 0.71073)                                                                  | MoKα (λ = 0.71073)                                                                  | MoKα (λ = 0.71073)                                                                 |
| 2θ range for data collection/°                                               | 4.85 to 50.052                                                                      | 6.196 to 49.932                                                                     | 4.73 to 52.71                                                                      |
| Index ranges                                                                 | -10 ≤ h ≤ 10, -23 ≤ k ≤ 24, -22 ≤ l ≤ 22                                            | -10 ≤ h ≤ 10, -25 ≤ k ≤ 25, -22 ≤ l ≤ 22                                            | -8 ≤ h ≤ 11, -26 ≤ k ≤ 26, -23 ≤ l ≤ 23                                            |
| Reflections collected                                                        | 31960                                                                               | 47922                                                                               | 36244                                                                              |
| Independent reflections                                                      | 6412 [R <sub>int</sub> = 0.0291, R <sub>sigma</sub> = 0.0210]                       | 6392 [R <sub>int</sub> = 0.0289, R <sub>sigma</sub> = 0.0152]                       | 7445 [R <sub>int</sub> = 0.0420, R <sub>sigma</sub> = 0.0316]                      |
| Data/restraints/parameters                                                   | 6412/0/482                                                                          | 6392/0/482                                                                          | 7445/0/482                                                                         |
| Goodness-of-fit on F <sup>2</sup>                                            | 1.041                                                                               | 1.091                                                                               | 1.064                                                                              |
| Final R indexes [I>=2σ (I)]                                                  | R <sub>1</sub> = 0.0238, wR <sub>2</sub> = 0.0632                                   | R <sub>1</sub> = 0.0230, wR <sub>2</sub> = 0.0484                                   | R <sub>1</sub> = 0.0365, wR <sub>2</sub> = 0.0944                                  |
| Final R indexes [all data]                                                   | R <sub>1</sub> = 0.0308,                                                            | R <sub>1</sub> = 0.0278, wR <sub>2</sub> = 0.0517                                   | R <sub>1</sub> = 0.0537, wR <sub>2</sub> = 0.1024                                  |
| Final R indexes [all data]<br>Largest diff. peak/hole / e<br>Å <sup>-3</sup> | wR <sub>2</sub> = 0.0690<br>0.89/-0.51                                              | R <sub>1</sub> = 0.0278, wR <sub>2</sub> = 0.0517<br>0.66/-0.39                     | R <sub>1</sub> = 0.0537, wR <sub>2</sub> = 0.1024<br>0.84/-0.30                    |

CCDC NO.

2163628

2163629

2163624

### Complex 1

PLAT430\_ALERT\_2\_A Short Inter D...A Contact O1W ..O1W . 1.78 Ang.

**Author response:** O1w is the oxygen atom of lattice water molecule and this alert arises due to disordered water molecule.

PLAT232\_ALERT\_2\_B Hirshfeld Test Diff (M-X) Ni1 --S1 . 12.2 s.u.

**Author response:** The best quality crystal has been mounted . S1 atom is a bit disordered but does not indicate an incorrect atom-type assignment.

### Complex 2

PLAT430\_ALERT\_2\_A Short Inter D...A Contact O1W ..O1W . 1.36 Ang.

**Author response:** O1w is the oxygen atom of lattice water molecule and this alert arises due to disordered water molecule.

### Complex 3

PLAT430\_ALERT\_2\_A Short Inter D...A Contact O1W ..O1W . 1.45 Ang.

**Author response:** O1w is the oxygen atom of lattice water molecule and this alert arises due to disordered water molecule.

### Complex 4

PLAT430\_ALERT\_2\_A Short Inter D...A Contact O1W ..O1W . 1.46 Ang.

**Author response:** O1w is the oxygen atom of lattice water molecule and this alert arises due to disordered water molecule.

PLAT232\_ALERT\_2\_B Hirshfeld Test Diff (M-X) Ni1 --S1 . 13.8 s.u.

**Author response:** The best quality crystal has been mounted . S1 atom is a bit disordered but does not indicate an incorrect atom-type assignment.

### Complex 5

PLAT430\_ALERT\_2\_A Short Inter D...A Contact O1W ..O1W . 1.42Ang.

**Author response:** O1w is the oxygen atom of lattice water molecule and this alert arises due to disordered water molecule.

PLAT232\_ALERT\_2\_B Hirshfeld Test Diff (M-X) Ni1 --S1 . 10.4 s.u.

**Author response:** The best quality crystal has been mounted . S1 atom is a bit disordered but does not indicate an incorrect atom-type assignment.

### Complex 6

PLAT430\_ALERT\_2\_A Short Inter D...A Contact O1W ..O1W . 1.51Ang.

**Author response:** O1w is the oxygen atom of lattice water molecule and this alert arises due to disordered water molecule.

PLAT232\_ALERT\_2\_B Hirshfeld Test Diff (M-X) Ni1 --S1 . 15.2 s.u.

**Author response:** The best quality crystal has been mounted. S1 atom is a bit disordered but this does not indicate an incorrect atom-type assignment.

PLAT910\_ALERT\_3\_B Missing # of FCF Reflection(s) Below Theta(Min). 12 Note

**Author response:** Some reflections had to be omitted in the refinement for technical reasons.

### Complex 7

PLAT430\_ALERT\_2\_A Short Inter D...A Contact O1W ..O1W . 1.47Ang.

**Author response:** O1w is the oxygen atom of lattice water molecule and this alert arises due to disordered water molecule.

PLAT232\_ALERT\_2\_B Hirshfeld Test Diff (M-X) Ni1 --S1 . 11.6 s.u.

**Author response:** The best quality crystal has been mounted. S1 atom is a bit disordered but this does not indicate an incorrect atom-type assignment.

**Table S2** Selected bond distances of 1

| Atom | Atom | Length/Å   |  | Atom | Atom | Length/Å   |
|------|------|------------|--|------|------|------------|
| Gd1  | O3   | 2.3619(18) |  | Gd1  | O10  | 2.502(2)   |
| Gd1  | O1   | 2.346(2)   |  | Gd1  | O7   | 2.478(3)   |
| Gd1  | O4   | 2.714(2)   |  | Ni1  | S1   | 2.5520(8)  |
| Gd1  | O8   | 2.505(2)   |  | Ni1  | S2   | 2.5436(9)  |
| Gd1  | O2   | 2.749(2)   |  | Ni1  | O3   | 2.0044(19) |
| Gd1  | O13  | 2.451(2)   |  | Ni1  | O1   | 2.0039(19) |
| Gd1  | O5   | 2.464(2)   |  | Ni1  | N2   | 2.013(2)   |
| Gd1  | O11  | 2.499(2)   |  | Ni1  | N1   | 2.029(2)   |

**Table S3** Selected bond angles of 1

| Atom | Atom | Atom | Angle/°   |  | Atom | Atom | Atom | Angle/°    |
|------|------|------|-----------|--|------|------|------|------------|
| O3   | Gd1  | O4   | 61.32(6)  |  | Ni1  | O3   | Gd1  | 104.27(7)  |
| O3   | Gd1  | O8   | 153.66(8) |  | Ni1  | O1   | Gd1  | 104.85(8)  |
| O3   | Gd1  | O2   | 120.15(7) |  | C1   | O1   | Gd1  | 130.52(19) |
| O3   | Gd1  | O13  | 84.28(7)  |  | O3   | Ni1  | Gd1  | 41.51(5)   |
| O3   | Gd1  | O5   | 82.28(8)  |  | O3   | Ni1  | S1   | 92.64(6)   |
| O3   | Gd1  | O11  | 126.46(8) |  | O3   | Ni1  | S2   | 106.24(6)  |
| O3   | Gd1  | O10  | 130.08(7) |  | O3   | Ni1  | N2   | 90.35(8)   |
| O3   | Gd1  | O7   | 79.01(8)  |  | O3   | Ni1  | N1   | 162.97(9)  |
| O3   | Gd1  | N5   | 106.16(8) |  | O1   | Ni1  | Gd1  | 41.04(6)   |
| O3   | Gd1  | N3   | 79.90(9)  |  | O1   | Ni1  | S1   | 100.19(6)  |
| O1   | Gd1  | O3   | 68.24(6)  |  | O1   | Ni1  | S2   | 91.48(6)   |
| O1   | Gd1  | O4   | 122.11(6) |  | O1   | Ni1  | O3   | 82.42(8)   |
| O1   | Gd1  | O8   | 127.01(7) |  | O1   | Ni1  | N2   | 164.01(9)  |
| O1   | Gd1  | O2   | 60.94(7)  |  | O1   | Ni1  | N1   | 89.30(9)   |
| O1   | Gd1  | O13  | 82.86(8)  |  | N2   | Ni1  | Gd1  | 130.99(7)  |

|     |     |     |            |  |     |     |     |            |
|-----|-----|-----|------------|--|-----|-----|-----|------------|
| O1  | Gd1 | O5  | 86.09(8)   |  | N2  | Ni1 | S1  | 94.36(7)   |
| O1  | Gd1 | O11 | 76.52(8)   |  | N2  | Ni1 | S2  | 76.81(7)   |
| O1  | Gd1 | O10 | 148.23(8)  |  | N2  | Ni1 | N1  | 101.13(10) |
| O1  | Gd1 | O7  | 129.33(9)  |  | N1  | Ni1 | Gd1 | 127.78(7)  |
| O1  | Gd1 | N5  | 79.05(8)   |  | N1  | Ni1 | S1  | 74.14(7)   |
| O1  | Gd1 | N3  | 108.39(10) |  | N1  | Ni1 | S2  | 88.76(7)   |
| O4  | Gd1 | O2  | 176.41(7)  |  | O10 | Gd1 | O8  | 50.41(7)   |
| O4  | Gd1 | N5  | 89.05(8)   |  | O10 | Gd1 | O2  | 109.73(7)  |
| O4  | Gd1 | N3  | 89.36(8)   |  | O10 | Gd1 | N5  | 71.03(9)   |
| O8  | Gd1 | O4  | 110.67(7)  |  | O10 | Gd1 | N3  | 101.09(11) |
| O8  | Gd1 | O2  | 66.49(8)   |  | O7  | Gd1 | O4  | 66.29(8)   |
| O8  | Gd1 | N5  | 98.43(9)   |  | O7  | Gd1 | O8  | 75.02(9)   |
| O8  | Gd1 | N3  | 74.81(10)  |  | O7  | Gd1 | O2  | 110.45(8)  |
| O2  | Gd1 | N5  | 93.52(8)   |  | O7  | Gd1 | O11 | 151.88(9)  |
| O2  | Gd1 | N3  | 87.74(8)   |  | O7  | Gd1 | O10 | 82.32(9)   |
| O13 | Gd1 | O4  | 66.22(7)   |  | O7  | Gd1 | N5  | 149.07(8)  |
| O13 | Gd1 | O8  | 116.68(8)  |  | O7  | Gd1 | N3  | 25.57(9)   |
| O13 | Gd1 | O2  | 116.82(8)  |  | N3  | Gd1 | N5  | 171.98(10) |
| O13 | Gd1 | O5  | 165.05(9)  |  | O5  | Gd1 | N5  | 158.42(9)  |
| O13 | Gd1 | O11 | 51.70(8)   |  | O5  | Gd1 | N3  | 25.53(9)   |
| O13 | Gd1 | O10 | 74.92(8)   |  | O11 | Gd1 | O4  | 112.50(8)  |
| O13 | Gd1 | O7  | 132.04(8)  |  | O11 | Gd1 | O8  | 79.84(8)   |
| O13 | Gd1 | N5  | 25.77(8)   |  | O11 | Gd1 | O2  | 69.57(8)   |
| O13 | Gd1 | N3  | 155.20(9)  |  | O11 | Gd1 | O10 | 71.92(10)  |
| O5  | Gd1 | O4  | 112.20(8)  |  | O11 | Gd1 | N5  | 25.94(8)   |
| O5  | Gd1 | O8  | 78.10(8)   |  | O11 | Gd1 | N3  | 151.21(9)  |
| O5  | Gd1 | O2  | 65.42(8)   |  | O10 | Gd1 | O4  | 68.77(7)   |

|    |     |     |           |  |    |     |     |           |
|----|-----|-----|-----------|--|----|-----|-----|-----------|
| O5 | Gd1 | O11 | 134.70(8) |  | S2 | Ni1 | Gd1 | 104.08(2) |
| O5 | Gd1 | O10 | 119.07(9) |  | S1 | Ni1 | Gd1 | 96.09(2)  |
| O5 | Gd1 | O7  | 51.09(9)  |  |    |     |     |           |

**Table S4** Selected bond distances of 2

| Atom | Atom | Length/Å |  | Atom | Atom | Length/Å   |
|------|------|----------|--|------|------|------------|
| Tb1  | O3   | 2.321(3) |  | Tb1  | O10  | 2.462(3)   |
| Tb1  | O1   | 2.318(3) |  | Ni1  | S1   | 2.5597(16) |
| Tb1  | O4   | 2.719(3) |  | Tb1  | O11  | 2.455(3)   |
| Tb1  | O8   | 2.473(3) |  | Ni1  | S2   | 2.5477(18) |
| Tb1  | O2   | 2.753(3) |  | Ni1  | O3   | 1.995(3)   |
| Tb1  | O5   | 2.440(3) |  | Ni1  | O1   | 1.986(3)   |
| Tb1  | O13  | 2.439(3) |  | Ni1  | N2   | 1.983(3)   |
| Tb1  | O7   | 2.447(3) |  | Ni1  | N1   | 2.018(3)   |

**Table S5** Selected bond angles of 2

| Atom | Atom | Atom | Angle/°    |  | Atom | Atom | Atom | Angle/°    |
|------|------|------|------------|--|------|------|------|------------|
| O3   | Tb1  | O4   | 61.30(8)   |  | Ni1  | O3   | Tb1  | 104.05(9)  |
| O3   | Tb1  | O8   | 153.70(10) |  | Ni1  | O1   | Tb1  | 104.45(10) |
| O3   | Tb1  | O2   | 120.65(9)  |  | S1   | Ni1  | Tb1  | 96.46(4)   |
| O3   | Tb1  | O5   | 82.89(11)  |  | S2   | Ni1  | Tb1  | 103.58(5)  |
| O3   | Tb1  | O13  | 83.35(10)  |  | S2   | Ni1  | S1   | 159.19(4)  |
| O3   | Tb1  | O7   | 80.06(11)  |  | O3   | Ni1  | Tb1  | 41.34(7)   |
| O3   | Tb1  | O11  | 126.17(11) |  | O3   | Ni1  | S1   | 92.37(8)   |
| O3   | Tb1  | O10  | 129.05(10) |  | O3   | Ni1  | S2   | 106.34(8)  |
| O3   | Tb1  | N5   | 105.36(11) |  | O3   | Ni1  | N1   | 162.80(11) |
| O3   | Tb1  | N3   | 80.81(12)  |  | O1   | Ni1  | Tb1  | 41.20(8)   |
| O1   | Tb1  | O3   | 68.87(8)   |  | O1   | Ni1  | S1   | 101.01(9)  |
| O1   | Tb1  | O4   | 122.68(8)  |  | O1   | Ni1  | S2   | 90.64(9)   |
| O1   | Tb1  | O8   | 126.23(9)  |  | O1   | Ni1  | O3   | 82.42(10)  |



|     |     |     |            |  |     |     |     |            |
|-----|-----|-----|------------|--|-----|-----|-----|------------|
| O1  | Tb1 | O2  | 60.86(9)   |  | O1  | Ni1 | N1  | 89.45(12)  |
| O1  | Tb1 | O5  | 85.80(11)  |  | N2  | Ni1 | Tb1 | 130.84(10) |
| O1  | Tb1 | O13 | 82.84(10)  |  | N2  | Ni1 | S1  | 93.57(10)  |
| O1  | Tb1 | O7  | 130.33(11) |  | N2  | Ni1 | S2  | 77.59(10)  |
| O1  | Tb1 | O11 | 76.05(11)  |  | N2  | Ni1 | O3  | 90.37(11)  |
| O1  | Tb1 | O10 | 148.41(10) |  | N2  | Ni1 | O1  | 163.94(12) |
| O1  | Tb1 | N5  | 78.70(11)  |  | N2  | Ni1 | N1  | 101.04(13) |
| O1  | Tb1 | N3  | 108.64(13) |  | N1  | Ni1 | Tb1 | 128.01(10) |
| O4  | Tb1 | O2  | 176.06(9)  |  | N1  | Ni1 | S1  | 74.27(9)   |
| O4  | Tb1 | N5  | 88.50(11)  |  | N1  | Ni1 | S2  | 88.80(9)   |
| O13 | Tb1 | O7  | 131.81(10) |  | O4  | Tb1 | N3  | 90.08(11)  |
| O13 | Tb1 | O11 | 52.25(10)  |  | O8  | Tb1 | O4  | 110.86(10) |
| O13 | Tb1 | O10 | 75.14(11)  |  | O8  | Tb1 | O2  | 65.80(10)  |
| O13 | Tb1 | N5  | 25.90(10)  |  | O8  | Tb1 | N5  | 99.21(12)  |
| O13 | Tb1 | N3  | 155.28(11) |  | O8  | Tb1 | N3  | 73.94(14)  |
| O7  | Tb1 | O4  | 66.71(10)  |  | O2  | Tb1 | N5  | 94.07(11)  |
| O7  | Tb1 | O8  | 74.06(12)  |  | O2  | Tb1 | N3  | 86.96(12)  |
| O7  | Tb1 | O2  | 109.85(10) |  | O5  | Tb1 | O4  | 112.99(10) |
| O7  | Tb1 | O11 | 151.06(11) |  | O5  | Tb1 | O8  | 77.59(12)  |
| O7  | Tb1 | O10 | 81.10(13)  |  | O5  | Tb1 | O2  | 64.70(11)  |
| O7  | Tb1 | N5  | 148.68(11) |  | O5  | Tb1 | O7  | 51.78(11)  |
| O7  | Tb1 | N3  | 26.02(11)  |  | O5  | Tb1 | O11 | 134.18(11) |
| O11 | Tb1 | O4  | 112.24(10) |  | O5  | Tb1 | O10 | 119.24(12) |
| O11 | Tb1 | O8  | 80.09(12)  |  | O5  | Tb1 | N5  | 158.12(11) |
| O11 | Tb1 | O2  | 69.72(10)  |  | O5  | Tb1 | N3  | 25.77(11)  |
| O11 | Tb1 | O10 | 72.60(13)  |  | O13 | Tb1 | O4  | 65.61(10)  |
| O11 | Tb1 | N5  | 26.36(10)  |  | O13 | Tb1 | O8  | 117.59(11) |
| O11 | Tb1 | N3  | 150.59(12) |  | O13 | Tb1 | O2  | 117.53(10) |
| O10 | Tb1 | O4  | 67.76(10)  |  | O13 | Tb1 | O5  | 164.62(11) |

|     |     |    |            |  |     |     |    |            |
|-----|-----|----|------------|--|-----|-----|----|------------|
| O10 | Tb1 | O8 | 51.36(10)  |  | O10 | Tb1 | N5 | 71.57(12)  |
| O10 | Tb1 | O2 | 110.25(10) |  | O10 | Tb1 | N3 | 100.59(14) |

**Table S6** Selected bond distances of 3

| Atom | Atom | Length/Å |  | Atom | Atom | Length/Å   |
|------|------|----------|--|------|------|------------|
| Dy1  | O5   | 2.419(3) |  | Dy1  | O11  | 2.458(3)   |
| Dy1  | O13  | 2.411(3) |  | Dy1  | O7   | 2.445(3)   |
| Dy1  | O3   | 2.333(2) |  | Ni1  | S1   | 2.5569(11) |
| Dy1  | O1   | 2.311(3) |  | Ni1  | S2   | 2.5456(12) |
| Dy1  | O4   | 2.712(3) |  | Ni1  | O3   | 1.995(3)   |
| Dy1  | O8   | 2.475(3) |  | Ni1  | O1   | 1.998(2)   |
| Dy1  | O10  | 2.464(3) |  | Ni1  | N2   | 2.005(3)   |
| Dy1  | O2   | 2.751(3) |  | Ni1  | N1   | 2.018(3)   |

**Table S7** Selected bond angles of 3

| Atom | Atom | Atom | Angle/°    |  | Atom | Atom | Atom | Angle/°    |
|------|------|------|------------|--|------|------|------|------------|
| O3   | Dy1  | O4   | 61.41(8)   |  | Ni1  | O3   | Dy1  | 103.93(10) |
| O3   | Dy1  | O8   | 153.58(11) |  | Ni1  | O1   | Dy1  | 104.64(10) |
| O3   | Dy1  | O10  | 129.36(9)  |  | O1   | Ni1  | S1   | 100.53(8)  |
| O3   | Dy1  | O2   | 120.67(9)  |  | O1   | Ni1  | S2   | 91.59(8)   |
| O3   | Dy1  | O5   | 81.88(10)  |  | O1   | Ni1  | N2   | 163.78(12) |
| O3   | Dy1  | O13  | 84.01(10)  |  | O1   | Ni1  | N1   | 89.77(13)  |
| O3   | Dy1  | O11  | 127.15(10) |  | N2   | Ni1  | S1   | 94.27(9)   |
| O3   | Dy1  | O7   | 79.35(11)  |  | N2   | Ni1  | S2   | 76.46(9)   |
| O3   | Dy1  | N5   | 106.15(11) |  | N2   | Ni1  | N1   | 100.75(13) |
| O3   | Dy1  | N3   | 79.62(12)  |  | N1   | Ni1  | S1   | 73.96(9)   |
| O1   | Dy1  | O3   | 68.92(9)   |  | N1   | Ni1  | S2   | 88.85(9)   |
| O1   | Dy1  | O4   | 122.75(8)  |  | S2   | Ni1  | S1   | 158.76(4)  |
| O1   | Dy1  | O8   | 126.04(10) |  | O3   | Ni1  | S1   | 92.34(8)   |
| O1   | Dy1  | O10  | 148.57(11) |  | O3   | Ni1  | S2   | 106.63(8)  |
| O1   | Dy1  | O2   | 60.94(9)   |  | O3   | Ni1  | O1   | 82.29(10)  |
| O1   | Dy1  | O5   | 85.27(12)  |  | O3   | Ni1  | N2   | 90.56(12)  |
| O1   | Dy1  | O13  | 82.70(10)  |  | O3   | Ni1  | N1   | 162.71(12) |
| O1   | Dy1  | O11  | 76.59(11)  |  | S2   | Ni1  | S1   | 158.76(4)  |
| O1   | Dy1  | O7   | 130.14(12) |  | O3   | Ni1  | S1   | 92.34(8)   |

|     |     |     |            |  |     |     |     |            |
|-----|-----|-----|------------|--|-----|-----|-----|------------|
| O1  | Dy1 | N5  | 78.93(11)  |  | O3  | Ni1 | S2  | 106.63(8)  |
| O1  | Dy1 | N3  | 108.10(13) |  | O13 | Dy1 | O2  | 117.03(10) |
| O4  | Dy1 | O2  | 175.96(9)  |  | O13 | Dy1 | O5  | 164.03(12) |
| O8  | Dy1 | O4  | 110.99(10) |  | O13 | Dy1 | O11 | 52.26(10)  |
| O8  | Dy1 | O2  | 65.53(10)  |  | O5  | Dy1 | O4  | 112.73(10) |
| O10 | Dy1 | O4  | 67.94(9)   |  | O5  | Dy1 | O8  | 78.36(11)  |
| O10 | Dy1 | O8  | 51.14(9)   |  | O5  | Dy1 | O10 | 119.61(12) |
| O10 | Dy1 | O2  | 109.90(10) |  | O13 | Dy1 | O2  | 117.03(10) |
| O10 | Dy1 | N5  | 71.52(12)  |  | O13 | Dy1 | O5  | 164.03(12) |
| O11 | Dy1 | O4  | 112.45(10) |  | O5  | Dy1 | O4  | 112.73(10) |
| O11 | Dy1 | O8  | 79.25(11)  |  | O5  | Dy1 | O8  | 78.36(11)  |
| O11 | Dy1 | O10 | 72.21(13)  |  | O5  | Dy1 | O10 | 119.61(12) |
| O11 | Dy1 | O2  | 69.42(10)  |  | O5  | Dy1 | O2  | 65.03(10)  |
| O7  | Dy1 | O4  | 66.28(10)  |  | O5  | Dy1 | O11 | 134.23(11) |
| O7  | Dy1 | O8  | 74.69(12)  |  | O5  | Dy1 | O7  | 52.11(11)  |
| O7  | Dy1 | O10 | 81.13(12)  |  | O13 | Dy1 | O4  | 66.11(10)  |
| O7  | Dy1 | O2  | 110.25(10) |  | O13 | Dy1 | O8  | 117.32(10) |
| O7  | Dy1 | O11 | 150.76(12) |  | O13 | Dy1 | O10 | 75.44(11)  |

**Table S8** Selected bond distances of 4

| Atom | Atom | Length/Å |  | Atom | Atom | Length/Å   |
|------|------|----------|--|------|------|------------|
| Ho1  | O3   | 2.319(2) |  | Ho1  | O8   | 2.465(2)   |
| Ho1  | O4   | 2.721(2) |  | Ho1  | O7   | 2.438(3)   |
| Ho1  | O1   | 2.307(2) |  | Ni1  | S1   | 2.5616(9)  |
| Ho1  | O2   | 2.764(2) |  | Ni1  | S2   | 2.5549(10) |
| Ho1  | O10  | 2.464(2) |  | Ni1  | O3   | 2.002(2)   |
| Ho1  | O5   | 2.421(2) |  | Ni1  | O1   | 2.001(2)   |
| Ho1  | O13  | 2.412(2) |  | Ni1  | N1   | 2.024(3)   |
| Ho1  | O11  | 2.457(2) |  | Ni1  | N2   | 2.009(3)   |

**Table S9** Selected bond angles of 4

| Atom | Atom | Atom | Angle/°   |  | Atom | Atom | Atom | Angle/°    |
|------|------|------|-----------|--|------|------|------|------------|
| O3   | Ho1  | O4   | 61.69(7)  |  | Ni1  | O3   | Ho1  | 104.09(8)  |
| O3   | Ho1  | O2   | 121.13(7) |  | O13  | Ho1  | N3   | 155.06(10) |
| O3   | Ho1  | O10  | 153.46(8) |  | O11  | Ho1  | O4   | 112.45(8)  |
| O3   | Ho1  | O5   | 81.93(9)  |  | O11  | Ho1  | O2   | 69.27(8)   |

|     |     |     |            |  |     |     |     |            |
|-----|-----|-----|------------|--|-----|-----|-----|------------|
| O3  | Ho1 | O13 | 83.83(8)   |  | O11 | Ho1 | O10 | 79.25(9)   |
| O3  | Ho1 | O11 | 127.26(8)  |  | Ni1 | O1  | Ho1 | 104.55(9)  |
| O3  | Ho1 | O7  | 79.42(9)   |  | O11 | Ho1 | O8  | 72.28(10)  |
| O3  | Ho1 | O8  | 128.97(8)  |  | O11 | Ho1 | N5  | 26.30(9)   |
| O3  | Ho1 | N5  | 106.33(9)  |  | O11 | Ho1 | N3  | 150.51(10) |
| O3  | Ho1 | N3  | 79.85(10)  |  | O7  | Ho1 | O4  | 66.16(8)   |
| O4  | Ho1 | O2  | 175.29(7)  |  | O7  | Ho1 | O2  | 110.08(8)  |
| O4  | Ho1 | N5  | 89.02(9)   |  | O7  | Ho1 | O10 | 74.51(10)  |
| O4  | Ho1 | N3  | 89.63(9)   |  | O7  | Ho1 | O11 | 150.59(10) |
| O1  | Ho1 | O3  | 69.16(7)   |  | O7  | Ho1 | O8  | 81.01(10)  |
| O1  | Ho1 | O4  | 123.35(7)  |  | O7  | Ho1 | N5  | 148.62(9)  |
| O1  | Ho1 | O2  | 61.11(8)   |  | O7  | Ho1 | N3  | 26.17(9)   |
| O1  | Ho1 | O10 | 125.84(8)  |  | O8  | Ho1 | O4  | 67.27(8)   |
| O1  | Ho1 | O5  | 85.12(9)   |  | O8  | Ho1 | O2  | 109.82(8)  |
| O1  | Ho1 | O13 | 83.04(8)   |  | O8  | Ho1 | N5  | 71.44(10)  |
| O1  | Ho1 | O11 | 76.61(8)   |  | O8  | Ho1 | N3  | 100.83(11) |
| O1  | Ho1 | O7  | 130.18(9)  |  | N3  | Ho1 | N5  | 172.05(11) |
| O1  | Ho1 | O8  | 148.66(9)  |  | S1  | Ni1 | Ho1 | 96.11(2)   |
| O1  | Ho1 | N5  | 79.01(8)   |  | S2  | Ni1 | Ho1 | 104.25(3)  |
| O1  | Ho1 | N3  | 108.20(10) |  | S2  | Ni1 | S1  | 158.89(3)  |
| O2  | Ho1 | N5  | 93.53(9)   |  | O3  | Ni1 | Ho1 | 41.23(6)   |
| O2  | Ho1 | N3  | 87.30(9)   |  | O3  | Ni1 | S1  | 92.27(7)   |
| O10 | Ho1 | O4  | 110.60(8)  |  | O3  | Ni1 | S2  | 106.66(7)  |
| O10 | Ho1 | O2  | 65.12(8)   |  | O3  | Ni1 | N1  | 162.51(10) |
| O10 | Ho1 | O8  | 51.50(8)   |  | O3  | Ni1 | N2  | 90.95(9)   |
| O10 | Ho1 | N5  | 98.58(9)   |  | O1  | Ni1 | Ho1 | 40.87(6)   |
| O10 | Ho1 | N3  | 74.59(11)  |  | O1  | Ni1 | S1  | 100.67(7)  |
| O5  | Ho1 | O4  | 112.75(8)  |  | O1  | Ni1 | S2  | 91.35(6)   |
| O5  | Ho1 | O2  | 65.07(8)   |  | O1  | Ni1 | O3  | 81.98(8)   |
| O5  | Ho1 | O10 | 78.26(9)   |  | O1  | Ni1 | N1  | 89.62(10)  |
| O5  | Ho1 | O11 | 134.14(9)  |  | O1  | Ni1 | N2  | 163.72(10) |
| O5  | Ho1 | O7  | 52.14(9)   |  | N1  | Ni1 | Ho1 | 127.80(8)  |
| O5  | Ho1 | O8  | 119.76(10) |  | N1  | Ni1 | S1  | 74.16(8)   |

|     |     |     |            |  |    |     |     |            |
|-----|-----|-----|------------|--|----|-----|-----|------------|
| O5  | Ho1 | N5  | 157.83(10) |  | N1 | Ni1 | S2  | 88.77(8)   |
| O5  | Ho1 | N3  | 25.97(9)   |  | N2 | Ni1 | Ho1 | 131.26(7)  |
| O13 | Ho1 | O4  | 65.94(8)   |  | N2 | Ni1 | S1  | 94.22(8)   |
| O13 | Ho1 | O2  | 117.39(8)  |  | N2 | Ni1 | S2  | 76.58(8)   |
| O13 | Ho1 | O10 | 117.49(8)  |  | N2 | Ni1 | N1  | 100.85(11) |

**Table S10** Selected bond distances of 5

| Atom | Atom | Length/Å |  | Atom | Atom | Length/Å   |
|------|------|----------|--|------|------|------------|
| Er1  | O4   | 2.725(2) |  | Er1  | O11  | 2.444(3)   |
| Er1  | O8   | 2.454(2) |  | Ni1  | O3   | 2.004(2)   |
| Er1  | O13  | 2.394(2) |  | Ni1  | O1   | 2.007(2)   |
| Er1  | O5   | 2.401(3) |  | Ni1  | N2   | 2.010(3)   |
| Er1  | O2   | 2.767(2) |  | Ni1  | N1   | 2.024(3)   |
| Er1  | O10  | 2.446(3) |  | Ni1  | S1   | 2.5562(10) |
| Er1  | O7   | 2.424(3) |  | Ni1  | S2   | 2.5512(10) |

**Table S11** Selected bond angles of 5

| Atom | Atom | Atom | Angle/°   |  | Atom | Atom | Atom | Angle/°   |
|------|------|------|-----------|--|------|------|------|-----------|
| O3   | Er1  | O4   | 61.49(7)  |  | Ni1  | O3   | Er1  | 103.90(9) |
| O3   | Er1  | O8   | 153.42(9) |  | Ni1  | O1   | Er1  | 104.40(9) |
| O3   | Er1  | O13  | 83.50(9)  |  | N4   | O8   | Er1  | 96.2(2)   |
| O3   | Er1  | O5   | 81.94(9)  |  | N5   | O13  | Er1  | 96.8(2)   |
| O3   | Er1  | O2   | 121.61(8) |  | N3   | O5   | Er1  | 96.2(2)   |
| O3   | Er1  | O10  | 128.67(8) |  | N4   | O10  | Er1  | 96.6(2)   |
| O3   | Er1  | O7   | 79.40(9)  |  | N3   | O7   | Er1  | 94.8(2)   |
| O3   | Er1  | O11  | 127.53(9) |  | N5   | O11  | Er1  | 94.4(2)   |
| O3   | Er1  | N5   | 106.29(9) |  | O3   | Ni1  | O1   | 81.92(9)  |
| O3   | Er1  | N3   | 79.71(10) |  | O3   | Ni1  | N2   | 90.97(10) |

|     |     |     |            |  |     |     |     |            |
|-----|-----|-----|------------|--|-----|-----|-----|------------|
| O1  | Er1 | O3  | 69.58(7)   |  | O3  | Ni1 | N1  | 162.50(11) |
| O1  | Er1 | O4  | 123.56(7)  |  | O1  | Ni1 | Er1 | 40.78(6)   |
| O1  | Er1 | O8  | 125.52(8)  |  | O1  | Ni1 | S1  | 100.85(7)  |
| O1  | Er1 | O13 | 82.75(9)   |  | O1  | Ni1 | S2  | 91.31(7)   |
| O1  | Er1 | O5  | 84.95(10)  |  | O1  | Ni1 | N2  | 163.68(11) |
| O1  | Er1 | O2  | 61.16(8)   |  | O1  | Ni1 | N1  | 89.82(11)  |
| O1  | Er1 | O10 | 148.49(9)  |  | N2  | Ni1 | Er1 | 131.28(8)  |
| O1  | Er1 | O7  | 130.52(10) |  | N2  | Ni1 | S1  | 94.06(8)   |
| O1  | Er1 | O11 | 76.41(9)   |  | N2  | Ni1 | S2  | 76.63(8)   |
| O1  | Er1 | N5  | 78.82(9)   |  | N2  | Ni1 | N1  | 100.71(11) |
| O1  | Er1 | N3  | 108.18(11) |  | N1  | Ni1 | Er1 | 127.92(8)  |
| O4  | Er1 | O2  | 175.09(8)  |  | N1  | Ni1 | S1  | 74.05(8)   |
| O4  | Er1 | N5  | 89.10(9)   |  | N1  | Ni1 | S2  | 88.77(8)   |
| O4  | Er1 | N3  | 89.59(10)  |  | N3  | Er1 | N5  | 172.26(11) |
| O8  | Er1 | O4  | 110.70(8)  |  | S1  | Ni1 | Er1 | 96.34(2)   |
| O8  | Er1 | O2  | 64.75(9)   |  | S2  | Ni1 | Er1 | 104.16(3)  |
| O8  | Er1 | N5  | 98.63(10)  |  | S2  | Ni1 | S1  | 158.76(3)  |
| O8  | Er1 | N3  | 74.73(11)  |  | O3  | Ni1 | Er1 | 41.25(6)   |
| O13 | Er1 | O4  | 66.03(8)   |  | O3  | Ni1 | S1  | 92.30(7)   |
| O13 | Er1 | O8  | 117.86(9)  |  | O3  | Ni1 | S2  | 106.73(7)  |
| O13 | Er1 | O5  | 163.51(10) |  | O2  | Er1 | N5  | 93.38(9)   |
| O13 | Er1 | O2  | 117.32(9)  |  | O2  | Er1 | N3  | 87.38(10)  |
| O13 | Er1 | O10 | 75.45(9)   |  | O10 | Er1 | O4  | 67.18(8)   |

|     |     |     |            |  |     |     |     |            |
|-----|-----|-----|------------|--|-----|-----|-----|------------|
| O13 | Er1 | O7  | 131.63(9)  |  | O10 | Er1 | O8  | 51.71(9)   |
| O13 | Er1 | O11 | 53.01(9)   |  | O10 | Er1 | O2  | 109.63(8)  |
| O13 | Er1 | N5  | 26.45(9)   |  | O10 | Er1 | N5  | 71.49(10)  |
| O13 | Er1 | N3  | 155.00(10) |  | O10 | Er1 | N3  | 101.00(12) |
| O5  | Er1 | O4  | 112.85(9)  |  | O7  | Er1 | O4  | 66.01(9)   |
| O5  | Er1 | O8  | 78.34(10)  |  | O7  | Er1 | O8  | 74.49(10)  |
| O5  | Er1 | O2  | 65.08(9)   |  | O7  | Er1 | O2  | 110.18(9)  |
| O5  | Er1 | O10 | 120.03(10) |  | O7  | Er1 | O10 | 80.84(10)  |
| O5  | Er1 | O7  | 52.51(10)  |  | O7  | Er1 | O11 | 150.36(10) |
| O5  | Er1 | O11 | 133.78(10) |  | O7  | Er1 | N5  | 148.52(10) |
| O5  | Er1 | N5  | 157.60(10) |  | O7  | Er1 | N3  | 26.39(10)  |
| O5  | Er1 | N3  | 26.12(10)  |  | O11 | Er1 | O10 | 72.34(11)  |
| O11 | Er1 | O4  | 112.73(9)  |  | O11 | Er1 | N5  | 26.57(9)   |
| O11 | Er1 | O8  | 79.02(10)  |  | O11 | Er1 | N3  | 150.33(11) |
| O11 | Er1 | O2  | 68.87(9)   |  |     |     |     |            |

**Table S12** Selected bond distances of 6

| Atom | Atom | Length/Å   |  | Atom | Atom | Length/Å   |
|------|------|------------|--|------|------|------------|
| Yb1  | O3   | 2.2947(18) |  | Ni1  | S1   | 2.5600(8)  |
| Yb1  | O11  | 2.428(2)   |  | Ni1  | S2   | 2.5588(9)  |
| Yb1  | O4   | 2.743(2)   |  | Ni1  | O3   | 2.0085(19) |
| Yb1  | O1   | 2.282(2)   |  | Ni1  | O1   | 2.0087(19) |
| Yb1  | O8   | 2.441(2)   |  | Ni1  | N1   | 2.027(2)   |
| Yb1  | O10  | 2.428(2)   |  | Ni1  | N2   | 2.012(2)   |
| Yb1  | O13  | 2.374(2)   |  | Yb1  | O2   | 2.785(2)   |
| Yb1  | O5   | 2.378(2)   |  | Yb1  | N5   | 2.825(3)   |
| Yb1  | O7   | 2.408(3)   |  | Yb1  | N3   | 2.807(3)   |

**Table S13** Selected bond angles of 6

| Atom | Atom | Atom | Angle/°    |  | Atom | Atom | Atom | Angle/°    |
|------|------|------|------------|--|------|------|------|------------|
| O3   | Yb1  | O11  | 128.12(8)  |  | Ni1  | O3   | Yb1  | 103.53(8)  |
| O3   | Yb1  | O4   | 61.51(6)   |  | Ni1  | O1   | Yb1  | 103.98(8)  |
| O3   | Yb1  | O8   | 152.99(8)  |  | O13  | Yb1  | O10  | 75.54(8)   |
| O3   | Yb1  | O10  | 127.99(7)  |  | O13  | Yb1  | O5   | 162.97(9)  |
| O3   | Yb1  | O13  | 83.43(8)   |  | O13  | Yb1  | O7   | 131.60(8)  |
| O3   | Yb1  | O5   | 81.74(8)   |  | O13  | Yb1  | O2   | 117.34(8)  |
| O3   | Yb1  | O7   | 79.19(8)   |  | O13  | Yb1  | N5   | 26.65(8)   |
| O3   | Yb1  | O2   | 122.31(7)  |  | O13  | Yb1  | N3   | 154.96(9)  |
| O3   | Yb1  | N5   | 106.56(8)  |  | O5   | Yb1  | O11  | 133.46(9)  |
| O3   | Yb1  | N3   | 79.41(9)   |  | O5   | Yb1  | O4   | 113.20(8)  |
| O11  | Yb1  | O4   | 112.67(8)  |  | O5   | Yb1  | O8   | 78.46(9)   |
| O11  | Yb1  | O8   | 78.85(9)   |  | O5   | Yb1  | O10  | 120.51(9)  |
| O11  | Yb1  | O2   | 68.60(8)   |  | O5   | Yb1  | O7   | 53.01(9)   |
| O11  | Yb1  | N5   | 26.70(8)   |  | O5   | Yb1  | O2   | 64.99(8)   |
| O11  | Yb1  | N3   | 150.10(9)  |  | O5   | Yb1  | N5   | 157.23(9)  |
| O4   | Yb1  | O2   | 174.52(7)  |  | O5   | Yb1  | N3   | 26.42(9)   |
| O4   | Yb1  | N5   | 89.09(8)   |  | O7   | Yb1  | O11  | 149.92(9)  |
| O4   | Yb1  | N3   | 89.67(9)   |  | O7   | Yb1  | O4   | 65.94(8)   |
| O1   | Yb1  | O3   | 70.29(6)   |  | O7   | Yb1  | O8   | 74.26(9)   |
| O1   | Yb1  | O11  | 76.54(8)   |  | O7   | Yb1  | O10  | 80.50(9)   |
| O1   | Yb1  | O4   | 124.26(6)  |  | O7   | Yb1  | O2   | 110.12(8)  |
| O1   | Yb1  | O8   | 125.10(8)  |  | O7   | Yb1  | N5   | 148.41(9)  |
| O1   | Yb1  | O10  | 148.67(8)  |  | O7   | Yb1  | N3   | 26.59(9)   |
| O1   | Yb1  | O13  | 82.88(8)   |  | O2   | Yb1  | N5   | 93.23(8)   |
| O1   | Yb1  | O5   | 84.29(9)   |  | O2   | Yb1  | N3   | 87.37(9)   |
| O1   | Yb1  | O7   | 130.65(8)  |  | N3   | Yb1  | N5   | 172.34(10) |
| O1   | Yb1  | O2   | 61.12(7)   |  | S1   | Yb1  | Yb1  | 96.44(2)   |
| O1   | Yb1  | N5   | 78.94(8)   |  | S2   | Yb1  | Yb1  | 104.24(2)  |
| O1   | Yb1  | N3   | 107.92(10) |  | S2   | Yb1  | S1   | 158.62(3)  |
| O8   | Yb1  | O4   | 110.42(7)  |  | O3   | Yb1  | Yb1  | 41.23(5)   |
| O8   | Yb1  | O2   | 64.33(8)   |  | O3   | Yb1  | S1   | 92.23(6)   |
| O8   | Yb1  | N5   | 98.71(9)   |  | O3   | Yb1  | S2   | 106.87(6)  |
| O8   | Yb1  | N3   | 74.67(10)  |  | O3   | Yb1  | O1   | 81.97(8)   |
| O10  | Yb1  | O11  | 72.39(9)   |  | O3   | Yb1  | N1   | 162.42(9)  |
| O10  | Yb1  | O4   | 66.48(7)   |  | O3   | Yb1  | N2   | 91.04(9)   |
| O10  | Yb1  | O8   | 52.10(8)   |  | O1   | Yb1  | Yb1  | 40.86(6)   |



|     |     |     |            |  |    |     |     |            |
|-----|-----|-----|------------|--|----|-----|-----|------------|
| O10 | Yb1 | O2  | 109.60(8)  |  | O1 | Yb1 | S1  | 101.16(6)  |
| O10 | Yb1 | N5  | 71.55(9)   |  | O1 | Yb1 | S2  | 91.17(6)   |
| O10 | Yb1 | N3  | 101.06(11) |  | O1 | Ni1 | N1  | 89.94(10)  |
| O13 | Yb1 | O11 | 53.34(8)   |  | O1 | Ni1 | N2  | 163.47(9)  |
| O13 | Yb1 | O4  | 66.03(7)   |  | N1 | Ni1 | Yb1 | 128.04(7)  |
| O13 | Yb1 | O8  | 118.21(8)  |  | N1 | Ni1 | S1  | 73.96(7)   |
| N2  | Ni1 | Yb1 | 131.29(7)  |  | N1 | Ni1 | S2  | 88.79(7)   |
| N2  | Ni1 | S1  | 94.03(7)   |  | N2 | Ni1 | N1  | 100.58(10) |
| N2  | Ni1 | S2  | 76.48(7)   |  |    |     |     |            |

**Table S14** Selected bond distances of 7

| Atom | Atom | Length/Å   |  | Atom | Atom | Length/Å   |
|------|------|------------|--|------|------|------------|
| Y1   | O1   | 2.306(2)   |  | Y1   | O4   | 2.727(2)   |
| Y1   | O3   | 2.3228(19) |  | Y1   | O2   | 2.763(2)   |
| Y1   | O13  | 2.404(2)   |  | Ni1  | O3   | 2.005(2)   |
| Y1   | O5   | 2.414(3)   |  | Ni1  | O1   | 2.005(2)   |
| Y1   | O7   | 2.436(3)   |  | Ni1  | N2   | 2.009(2)   |
| Y1   | O11  | 2.447(2)   |  | Ni1  | N1   | 2.027(3)   |
| Y1   | O10  | 2.451(2)   |  | Ni1  | S2   | 2.5508(10) |
| Y1   | O8   | 2.459(2)   |  | Ni1  | S1   | 2.5567(10) |

**Table S15** Selected bond angles of 7

| Atom | Atom | Atom | Angle/°    |  | Atom | Atom | Atom | Angle/°    |
|------|------|------|------------|--|------|------|------|------------|
| O1   | Y1   | O3   | 69.35(7)   |  | O3   | Ni1  | N2   | 90.65(9)   |
| O1   | Y1   | O13  | 82.81(8)   |  | O1   | Ni1  | N2   | 163.55(10) |
| O3   | Y1   | O13  | 83.76(8)   |  | O3   | Ni1  | N1   | 162.62(10) |
| O1   | Y1   | O5   | 85.01(9)   |  | O1   | Ni1  | N1   | 89.79(10)  |
| O3   | Y1   | O5   | 82.05(8)   |  | N2   | Ni1  | N1   | 100.86(10) |
| O13  | Y1   | O5   | 163.86(9)  |  | O3   | Ni1  | S2   | 106.64(7)  |
| O1   | Y1   | O7   | 130.42(9)  |  | O1   | Ni1  | S2   | 91.34(6)   |
| O3   | Y1   | O7   | 79.42(9)   |  | N2   | Ni1  | S2   | 76.54(8)   |
| O13  | Y1   | O7   | 131.70(9)  |  | N1   | Ni1  | S2   | 88.83(8)   |
| O5   | Y1   | O7   | 52.51(9)   |  | O7   | Y1   | N3   | 26.37(10)  |
| O1   | Y1   | O11  | 76.57(8)   |  | O11  | Y1   | N3   | 150.57(10) |
| O3   | Y1   | O11  | 127.36(8)  |  | O10  | Y1   | N3   | 100.99(11) |
| O13  | Y1   | O11  | 52.58(8)   |  | O8   | Y1   | N3   | 74.88(11)  |
| O5   | Y1   | O11  | 133.92(9)  |  | O4   | Y1   | N3   | 89.63(9)   |
| O7   | Y1   | O11  | 150.43(10) |  | O2   | Y1   | N3   | 87.41(9)   |

|     |    |     |            |  |     |     |    |            |
|-----|----|-----|------------|--|-----|-----|----|------------|
| O1  | Y1 | O10 | 148.56(9)  |  | O1  | Y1  | N5 | 78.99(8)   |
| O3  | Y1 | O10 | 128.82(8)  |  | O3  | Y1  | N5 | 106.30(9)  |
| O13 | Y1 | O10 | 75.32(9)   |  | O13 | Y1  | N5 | 26.19(8)   |
| O5  | Y1 | O10 | 119.90(10) |  | O5  | Y1  | N5 | 157.69(9)  |
| O7  | Y1 | O10 | 80.87(10)  |  | O7  | Y1  | N5 | 148.39(9)  |
| O11 | Y1 | O10 | 72.24(10)  |  | O11 | Y1  | N5 | 26.40(8)   |
| O1  | Y1 | O8  | 125.70(8)  |  | O10 | Y1  | N5 | 71.38(9)   |
| O3  | Y1 | O8  | 153.57(8)  |  | O8  | Y1  | N5 | 98.46(9)   |
| O13 | Y1 | O8  | 117.47(8)  |  | O4  | Y1  | N5 | 88.94(9)   |
| O5  | Y1 | O8  | 78.35(9)   |  | O2  | Y1  | N5 | 93.52(9)   |
| O7  | Y1 | O8  | 74.61(9)   |  | N3  | Y1  | N5 | 172.17(11) |
| O11 | Y1 | O8  | 79.05(9)   |  | O3  | Ni1 | O1 | 82.11(8)   |
| O10 | Y1 | O8  | 51.51(8)   |  | O1  | Ni1 | S1 | 100.69(7)  |
| O1  | Y1 | O4  | 123.29(7)  |  | N2  | Ni1 | S1 | 94.32(8)   |
| O3  | Y1 | O4  | 61.47(7)   |  | N1  | Ni1 | S1 | 74.02(8)   |
| O13 | Y1 | O4  | 66.06(8)   |  | S2  | Ni1 | S1 | 158.85(3)  |
| O5  | Y1 | O4  | 112.96(8)  |  | O3  | Ni1 | Y1 | 41.35(5)   |
| O7  | Y1 | O4  | 66.09(8)   |  | O1  | Ni1 | Y1 | 40.87(6)   |
| O11 | Y1 | O4  | 112.48(8)  |  | N2  | Ni1 | Y1 | 131.04(7)  |
| O10 | Y1 | O4  | 67.35(7)   |  | N1  | Ni1 | Y1 | 128.00(8)  |
| O8  | Y1 | O4  | 110.77(8)  |  | S2  | Ni1 | Y1 | 104.13(3)  |
| O1  | Y1 | O2  | 61.04(8)   |  | S1  | Ni1 | Y1 | 96.27(2)   |
| O3  | Y1 | O2  | 121.28(7)  |  | O8  | Y1  | O2 | 65.07(8)   |
| O13 | Y1 | O2  | 117.17(8)  |  | O4  | Y1  | O2 | 175.43(8)  |
| O5  | Y1 | O2  | 64.94(8)   |  | O1  | Y1  | N3 | 108.15(11) |
| O7  | Y1 | O2  | 110.26(8)  |  | O3  | Y1  | N3 | 79.70(10)  |
| O11 | Y1 | O2  | 69.18(8)   |  | O13 | Y1  | N3 | 155.12(10) |
| O10 | Y1 | O2  | 109.82(8)  |  | O5  | Y1  | N3 | 26.14(10)  |

**Table S16** Results of continuous shape measures calculations using program SHAPE 2.1 for Ni<sup>II</sup> ions of 1–7.<sup>a</sup>

| Metal Ion | JPPY-6 | TPR-6 | OC-6         | PPY-6  | HP-6   |
|-----------|--------|-------|--------------|--------|--------|
| Ni1 of 1  | 24.273 | 9.217 | <b>3.835</b> | 21.188 | 34.529 |
| Ni1 of 2  | 36.821 | 9.587 | <b>3.845</b> | 35.582 | 48.441 |
| Ni1 of 3  | 36.733 | 9.566 | <b>3.897</b> | 36.512 | 48.258 |
| Ni1 of 4  | 24.298 | 9.283 | <b>3.847</b> | 21.216 | 34.488 |
| Ni1 of 5  | 36.693 | 9.550 | <b>3.867</b> | 34.899 | 48.469 |
| Ni1 of 6  | 24.391 | 9.190 | <b>3.841</b> | 21.291 | 34.632 |

|          |        |       |              |        |        |
|----------|--------|-------|--------------|--------|--------|
| Ni1 of 7 | 36.596 | 9.482 | <b>3.901</b> | 33.397 | 48.438 |
|----------|--------|-------|--------------|--------|--------|

<sup>a</sup> JPPY-6 = Johnson pentagonal pyramid J2, TPR-6 = Trigonal prism, OC-6 = Octahedron, PPY-6 = Pentagonal pyramid, HP-6 = Hexagon

**Table S17** Results of continuous shape measures calculations S1–S3 using program SHAPE 2.1 for Ln<sup>III</sup> atoms of 1–7.<sup>a</sup>

| Metal ion | HD-10 | TD-10 | SDD-10 | JSPC-10 | JATDI-10 | JMBIC-10 | JBCSAPR-10   | JBCCU-10 | PAPR-10 | PPR-10 | OBPY-10 | EPY-10 | DP-10  |
|-----------|-------|-------|--------|---------|----------|----------|--------------|----------|---------|--------|---------|--------|--------|
| Gd        | 4.632 | 3.24  | 4.057  | 4.078   | 19.241   | 6.26     | <b>3.18</b>  | 6.72     | 10.304  | 11.741 | 15.649  | 24.885 | 32.967 |
| Tb        | 4.672 | 3.392 | 4.171  | 4.018   | 19.307   | 6.395    | <b>3.159</b> | 6.509    | 10.406  | 11.804 | 15.727  | 24.989 | 35.784 |
| Dy        | 4.723 | 3.466 | 4.28   | 3.988   | 19.376   | 6.448    | <b>3.105</b> | 6.553    | 10.307  | 11.765 | 15.628  | 24.94  | 35.589 |
| Ho        | 4.756 | 3.501 | 4.306  | 3.981   | 19.654   | 6.498    | <b>3.025</b> | 6.582    | 10.596  | 11.364 | 15.691  | 24.476 | 35.798 |
| Er        | 4.762 | 3.559 | 4.335  | 3.838   | 19.336   | 6.504    | <b>2.884</b> | 6.4      | 10.379  | 11.93  | 15.82   | 24.901 | 35.426 |
| Yb        | 4.698 | 3.559 | 4.358  | 3.904   | 19.741   | 6.698    | <b>2.896</b> | 6.9      | 10.874  | 11.852 | 15.874  | 24.187 | 35.498 |
| Y         | 4.748 | 3.529 | 4.326  | 3.91    | 19.381   | 6.483    | <b>2.964</b> | 6.433    | 10.323  | 11.861 | 15.779  | 24.907 | 35.473 |

<sup>a</sup> DP-10 =Decagon, EPY-10 =Enneagonal pyramid, OBPY-10= Octagonal bipyramid, PPR-10= Pentagonal prism, PAPR-10 =Pentagonal antiprism, JBCCU-10= Bicapped cube (Elongated square bipyramid J15), JBCSAPR-10=Bicapped square antiprism (Gyroelongated square bipyramid J17), JMBIC-10=Metabidiminshed icosahedron (J62), JATDI-10 Augmented tridiminshed icosahedron (J64) = JSPC-10 Sphenocorona (J87), SDD-10 Staggered dodecahedron (2:6:2), TD-10 Tetradekahedron (2:6:2), HD-10 Hexadecahedron (2:6:2, or 1:4:4:1).

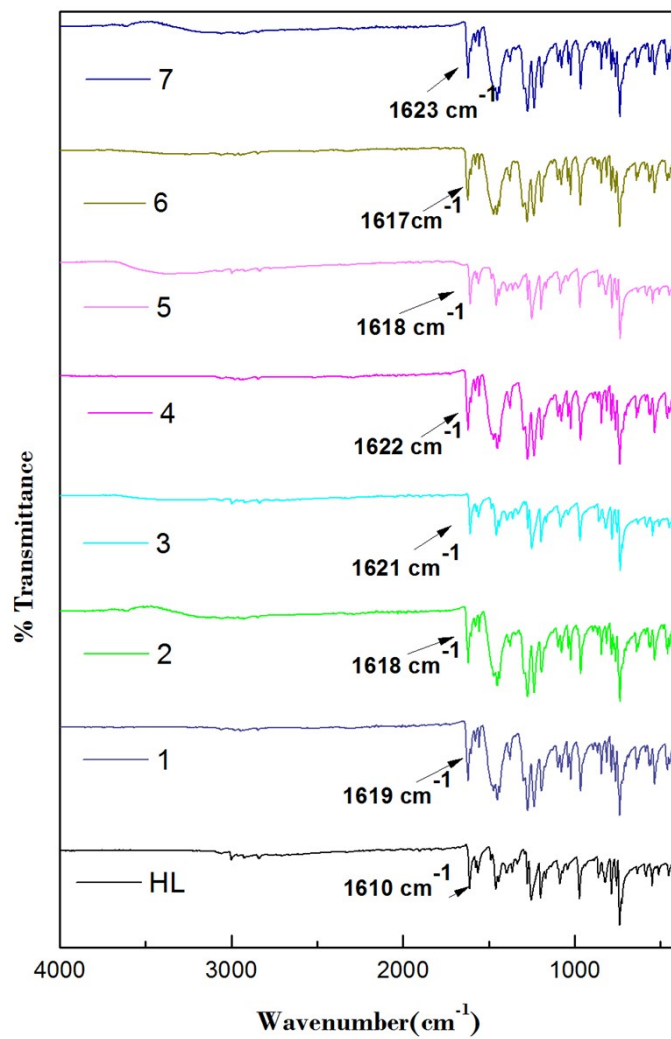

**Fig. S1** FTIR spectra of HL, Complex 1-7

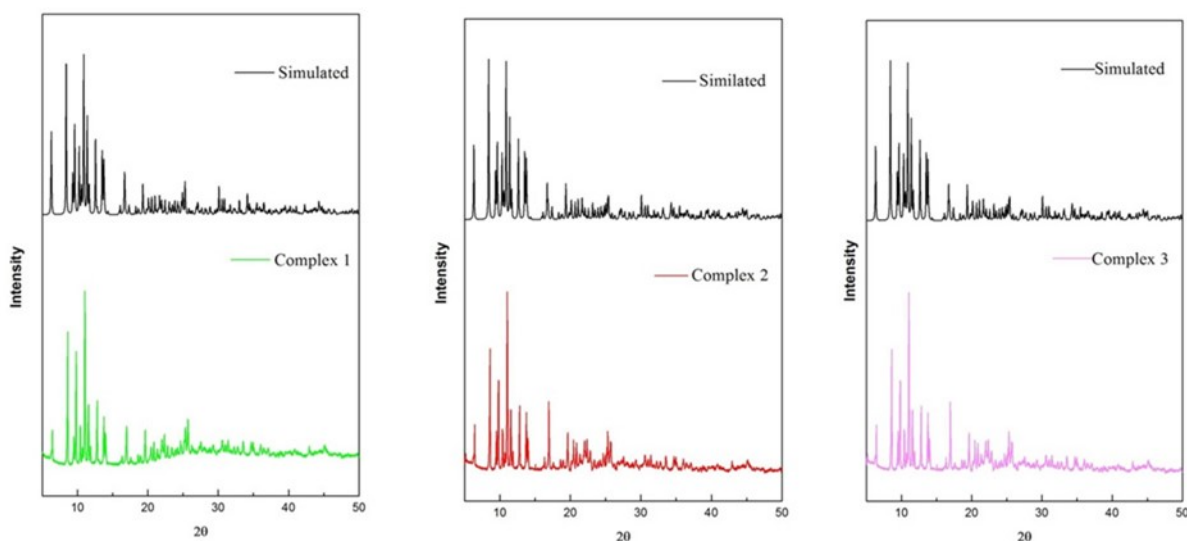

**Fig. S2** PXRD patterns of Complexes 1-3

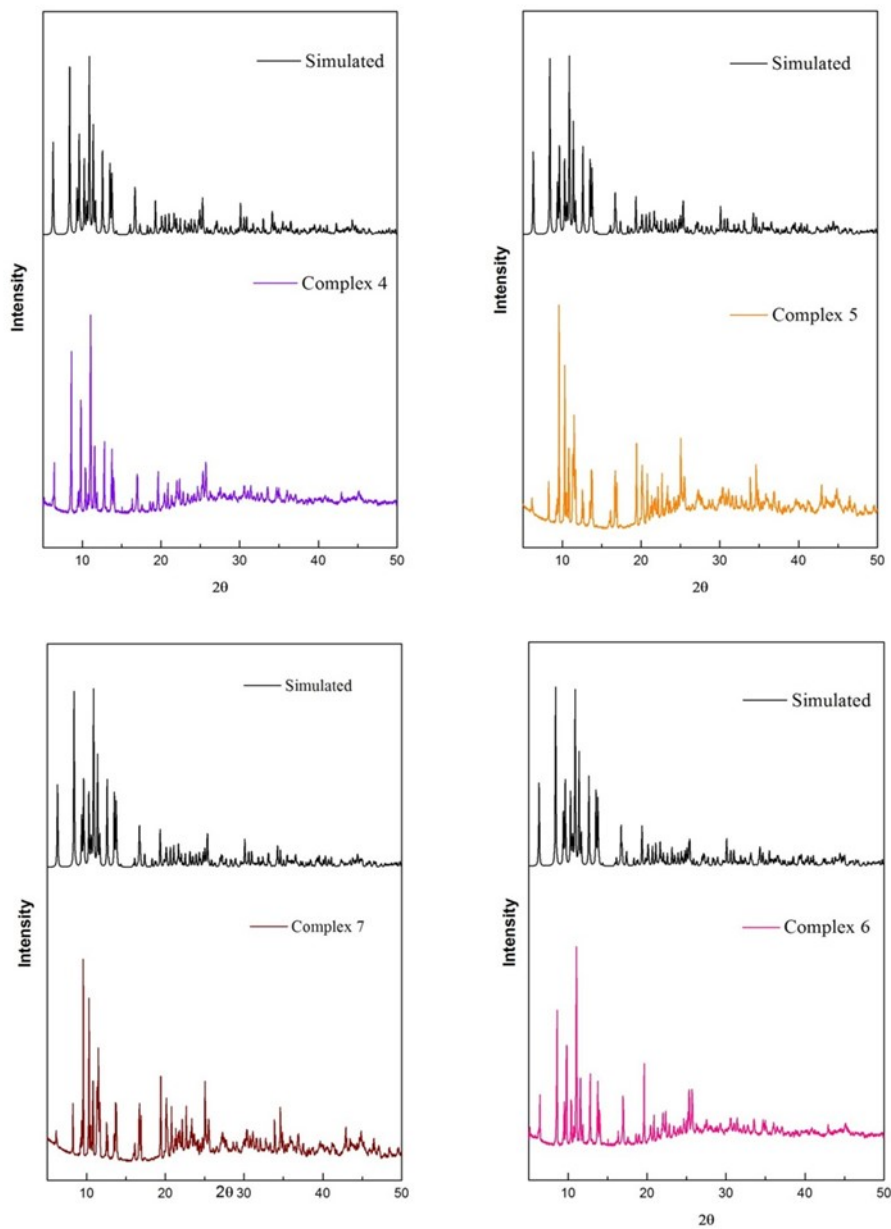

**Fig. S3.** PXR patterns of Complexes 4–7

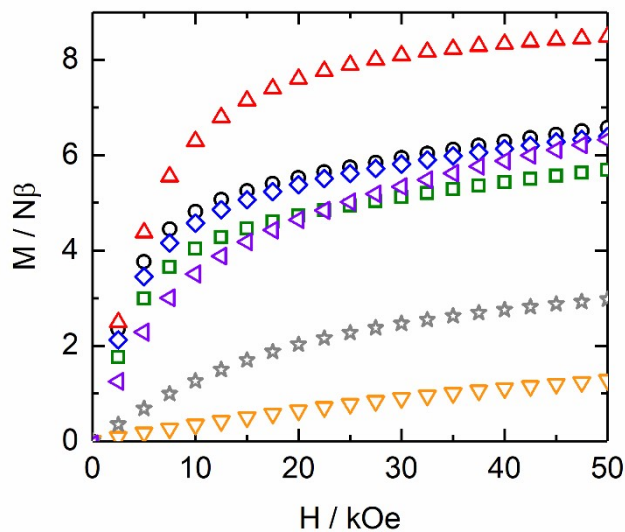

**Fig. S4.** Field variation of the magnetization at 2 K for **1** (red up triangles), **2** (blue lozenges), **3** (black circles), **4** (purple triangles), **5** (green squares), **6** (grey stars) and **7** (down orange triangles).

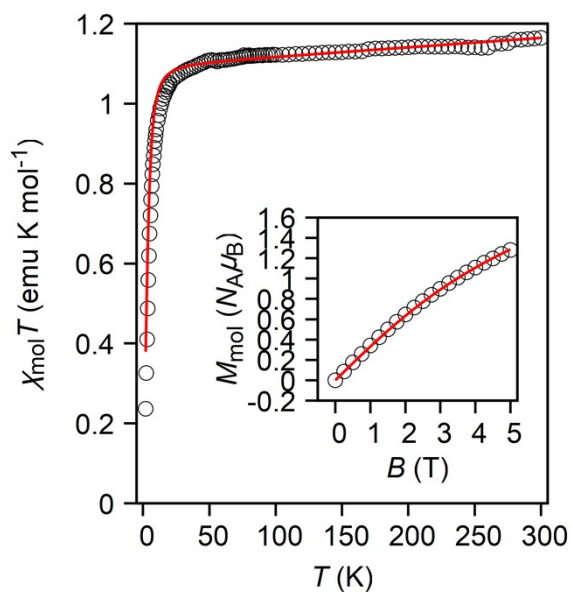

**Fig. S5.** Magnetic data for **7**. Temperature dependence of the  $\chi T$  product and the isothermal magnetization measured at  $T = 2$  K. Experimental data – full symbols, calculated data with Eq. 1 and parameters in text – full line.

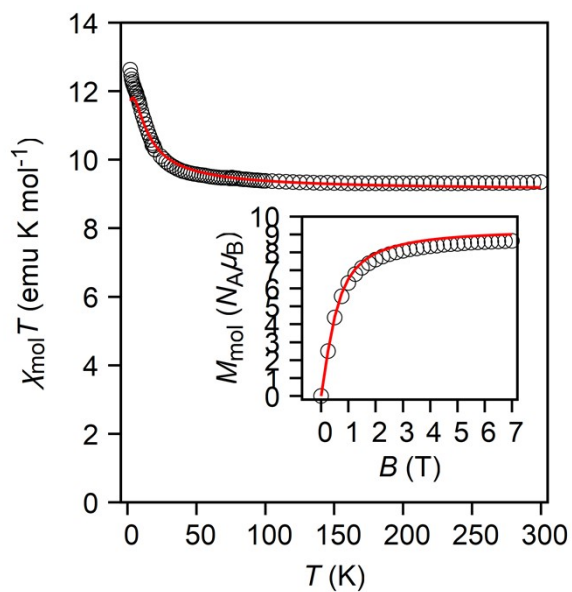

**Fig. S6** Magnetic data for **1**. Temperature dependence of the  $\chi T$  product and the isothermal magnetization measured at  $T = 2$  K. Experimental data – full symbols, calculated data with Eq. 2 and parameters in text – full line.

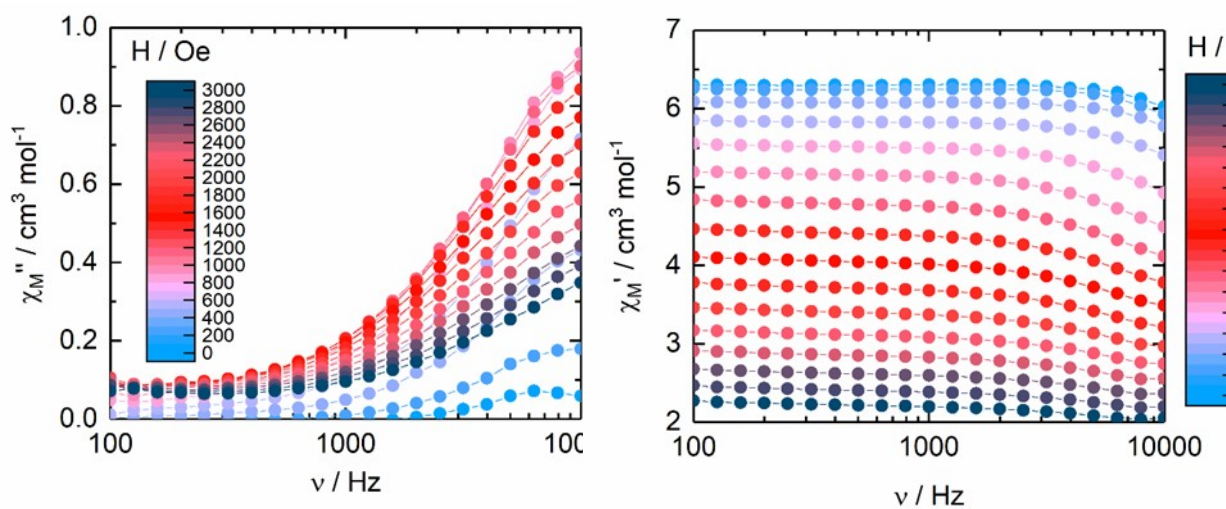

**Fig. S7** Field dependence of the in-phase ( $\chi_M'$ ) and out-of-phase ( $\chi_M''$ ) component of the magnetic susceptibility at 2 K for **3**.

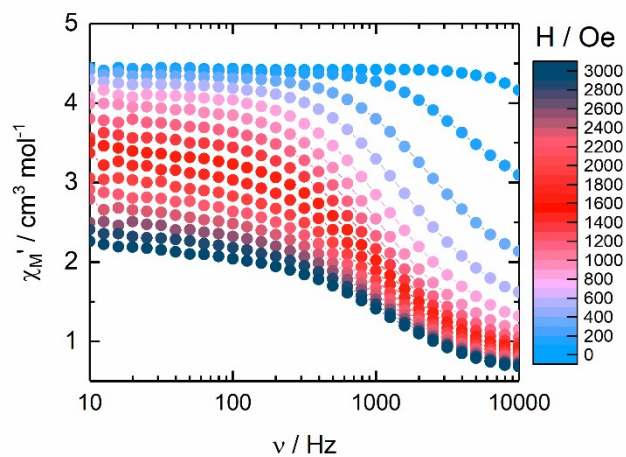

**Fig. S8** Field dependence of the in-phase ( $\chi_M'$ ) component of the magnetic susceptibility at 2 K for **5**.

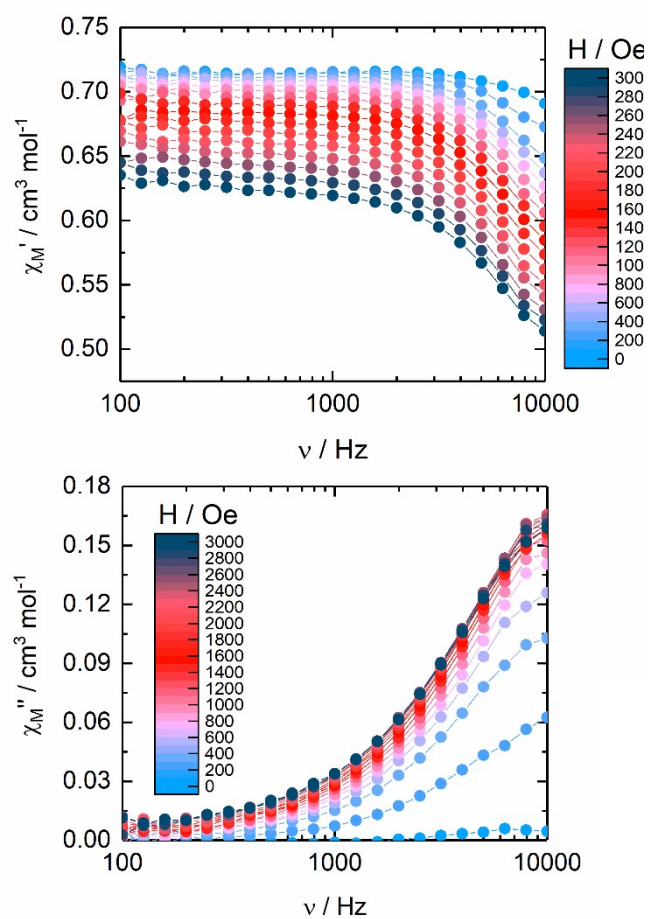

**Fig. S9** Field dependence of the in-phase ( $\chi_M'$ ) and out-of-phase ( $\chi_M''$ ) component of the magnetic susceptibility at 2 K for **6**.



**Extended Debye model used for a single relaxation contribution (Equation S1).**

$$\chi_M' = \chi_S + (\chi_T - \chi_S) \frac{1 + (\omega\tau)^{1-\alpha} \sin\left(\alpha \frac{\pi}{2}\right)}{1 + 2(\omega\tau)^{1-\alpha} \sin\left(\alpha \frac{\pi}{2}\right) + (\omega\tau)^{2-2\alpha}}$$

$$\chi_M'' = (\chi_T - \chi_S) \frac{(\omega\tau)^{1-\alpha} \cos\left(\alpha \frac{\pi}{2}\right)}{1 + 2(\omega\tau)^{1-\alpha} \sin\left(\alpha \frac{\pi}{2}\right) + (\omega\tau)^{2-2\alpha}}$$

With  $\chi_T$  the isothermal susceptibility,  $\chi_S$  the adiabatic susceptibility,  $\tau$  the relaxation time and  $\alpha$  an empiric parameter which describe the distribution of the relaxation time. For SMM with only one relaxation time,  $\alpha$  is close to zero. The extended Debye model was applied to fit simultaneously the experimental variations of  $\chi_M'$  and  $\chi_M''$  with the frequency  $\nu$  of the oscillating field ( $\omega = 2\pi\nu$ ). Typically, only the temperatures for which a maximum on the  $\chi''$  vs.  $f$  curves, have been considered. The best fitted parameters  $\tau$ ,  $\alpha$ ,  $\chi_T$ ,  $\chi_S$  are listed in Tables S18-S19 with the coefficient of determination  $R^2$ .

**Table S18.** Best fitted parameters ( $\chi_T$ ,  $\chi_S$ ,  $\tau$  and  $\alpha$ ) with the extended Debye model (Equation S1) for compound **5** at 2 K in the magnetic field range 0-3000 Oe.

| H / Oe | $\chi_T / \text{cm}^3 \text{mol}^{-1}$ | $\chi_S / \text{cm}^3 \text{mol}^{-1}$ | $\tau / \text{s}$ | $\alpha$ | $R^2$   |
|--------|----------------------------------------|----------------------------------------|-------------------|----------|---------|
| 0      | 4.4215                                 | 3.83367                                | 1.41611E-5        | 0.10542  | 0.99995 |
| 200    | 4.41707                                | 2.55597                                | 3.13909E-5        | 0.11073  | 0.99987 |
| 400    | 4.37304                                | 1.68821                                | 5.98387E-5        | 0.15072  | 0.99976 |
| 600    | 4.28                                   | 1.26142                                | 8.77399E-5        | 0.17034  | 0.99966 |
| 800    | 4.14617                                | 1.05152                                | 1.1884E-4         | 0.17369  | 0.99961 |
| 1000   | 4.0003                                 | 0.92477                                | 1.41968E-4        | 0.17937  | 0.99969 |
| 1200   | 3.811                                  | 0.84086                                | 1.5439E-4         | 0.1817   | 0.99974 |
| 1400   | 3.62176                                | 0.77044                                | 1.61356E-4        | 0.19216  | 0.99972 |
| 1600   | 3.45586                                | 0.69762                                | 1.67877E-4        | 0.21709  | 0.99948 |
| 1800   | 3.28218                                | 0.6354                                 | 1.7327E-4         | 0.2409   | 0.99896 |
| 2000   | 3.08198                                | 0.59505                                | 1.74748E-4        | 0.25302  | 0.99856 |
| 2200   | 2.89638                                | 0.55912                                | 1.73259E-4        | 0.26432  | 0.99899 |
| 2400   | 2.72952                                | 0.51158                                | 1.67457E-4        | 0.28407  | 0.99784 |
| 2600   | 2.54244                                | 0.4882                                 | 1.57571E-4        | 0.28603  | 0.9982  |
| 2800   | 2.39493                                | 0.45627                                | 1.49007E-4        | 0.29945  | 0.99866 |
| 3000   | 2.25079                                | 0.41579                                | 1.37335E-4        | 0.31726  | 0.99775 |

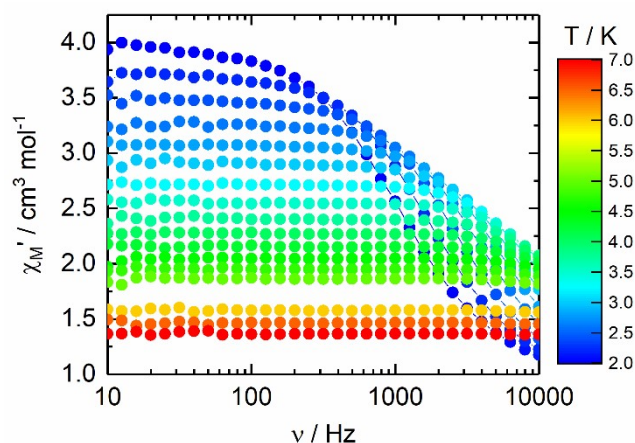

**Figure S10.** Thermal dependence of the in-phase component of the magnetic susceptibility in the 2-7 K temperature range under an applied dc field of 1000 Oe.

**Table S19.** Best fitted parameters ( $\chi_T$ ,  $\chi_S$ ,  $\tau$  and  $\alpha$ ) with the extended Debye model for compound **5** at 1000 Oe in the temperature range 2-3.5 K.

| T / K | $\chi_S / \text{cm}^3 \text{mol}^{-1}$ | $\chi_T / \text{cm}^3 \text{mol}^{-1}$ | $\alpha$ | $\tau / \text{s}$ | $R^2$   |
|-------|----------------------------------------|----------------------------------------|----------|-------------------|---------|
| 2     | 0.91012                                | 3.99416                                | 0.18712  | 1.3882E-4         | 0.99955 |
| 2.2   | 0.92102                                | 3.72497                                | 0.14787  | 8.50329E-5        | 0.99971 |
| 2.4   | 0.92004                                | 3.49123                                | 0.12022  | 5.48819E-5        | 0.99982 |
| 2.6   | 0.92522                                | 3.26328                                | 0.09037  | 3.71779E-5        | 0.99978 |
| 2.8   | 0.91768                                | 3.07846                                | 0.0739   | 2.64489E-5        | 0.9999  |
| 3     | 0.88955                                | 2.9109                                 | 0.06674  | 1.92618E-5        | 0.99985 |
| 3.25  | 0.91371                                | 2.71838                                | 0.04161  | 1.41528E-5        | 0.99991 |
| 3.5   | 0.90637                                | 2.55488                                | 0.03139  | 1.06741E-5        | 0.99987 |

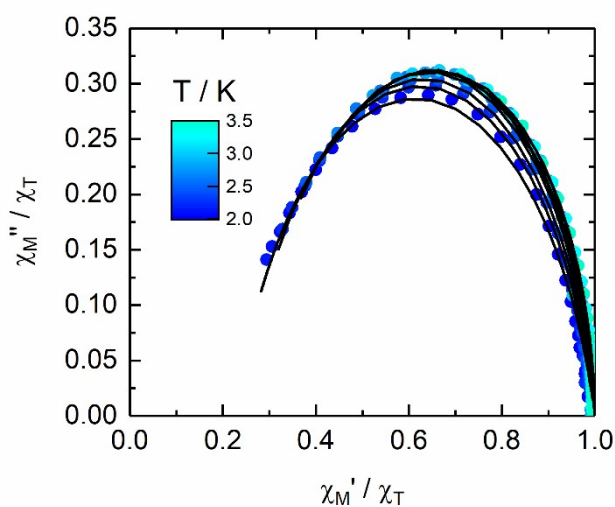

**Fig. S11** Normalized Argand plot for **5** in the 2-3.5 K temperature range under an applied magnetic field of 1000 Oe. Black lines are the best fitted curves.

**Table S20.** The splitting of the lowest multiplet for Tb<sup>III</sup> ion in **2** calculated by SINGLE\_ANISO together with g-values for selected pseudo-doublets and respective tunneling rates.

|                         |                                                 |
|-------------------------|-------------------------------------------------|
| $E$ (cm <sup>-1</sup> ) |                                                 |
| 0.0000                  | $g_x = 0.000, g_y = 0.000, g_z = 14.005$        |
| 4.0354                  | $\Delta_{\text{tun}} = 4.0354 \text{ cm}^{-1}$  |
| 19.7537                 | $g_x = 0.000, g_y = 0.000, g_z = 12.367$        |
| 25.8238                 | $\Delta_{\text{tun}} = 6.0701 \text{ cm}^{-1}$  |
| 85.4031                 | $g_x = 0.000, g_y = 0.000, g_z = 11.661$        |
| 110.6818                | $\Delta_{\text{tun}} = 25.2787 \text{ cm}^{-1}$ |
| 120.4673                |                                                 |
| 179.6947                |                                                 |
| 187.0285                |                                                 |
| 233.9950                |                                                 |
| 236.1455                |                                                 |
| 292.4828                |                                                 |
| 293.4464                |                                                 |

**Table S21.** The splitting of the lowest multiplet for Dy<sup>III</sup> ion in **3** calculated by SINGLE\_ANISO together with g-values for each Kramers doublets and respective transition magnetic moments within each doublet quantifying probability for the quantum tunneling (QTM).

| $E$ (cm <sup>-1</sup> ) | $g_x$      | $g_y$      | $g_z$       | QTM                |
|-------------------------|------------|------------|-------------|--------------------|
| 0.000                   | 0.31319550 | 1.20659219 | 18.68270489 | 0.253297948279E+00 |
| 25.451                  | 0.49675664 | 1.51063287 | 17.59960012 | 0.282445368238E+01 |

|         |             |            |             |                    |
|---------|-------------|------------|-------------|--------------------|
| 89.889  | 2.68392907  | 3.05890292 | 13.75618319 | 0.190683558559E+01 |
| 136.410 | 0.59713707  | 4.29037007 | 12.80159984 | 0.258139680755E+01 |
| 162.420 | 10.04843229 | 7.09768765 | 3.60982819  | 0.180594933405E+01 |
| 189.956 | 0.05487585  | 0.45666727 | 15.52658202 | 0.140391091441E+00 |
| 223.323 | 0.86518520  | 1.29984010 | 17.74495210 | 0.554136178849E+00 |
| 418.672 | 0.00105111  | 0.01239049 | 19.68701617 | 0.413796333644E-01 |

**Table S22.** The splitting of the lowest multiplet for Ho<sup>III</sup> ion **4** calculated by SINGLE\_ANISO together with g-values for selected pseudo-doublets and respective tunneling rates.

|                         |                                               |
|-------------------------|-----------------------------------------------|
| $E$ (cm <sup>-1</sup> ) |                                               |
| 0.000                   | $g_x = 0.000, g_y = 0.000, g_z = 13.224$      |
| 1.827                   | $\Delta_{\text{tun}} = 1.827 \text{ cm}^{-1}$ |
| 36.887                  | $g_x = 0.000, g_y = 0.000, g_z = 8.140$       |
| 42.461                  | $\Delta_{\text{tun}} = 5.574 \text{ cm}^{-1}$ |
| 73.63                   |                                               |
| 79.48                   |                                               |
| 98.42                   |                                               |
| 143.34                  |                                               |
| 204.81                  |                                               |
| 212.05                  |                                               |
| 232.04                  |                                               |
| 258.76                  |                                               |
| 272.19                  |                                               |
| 276.96                  |                                               |
| 287.71                  |                                               |

|        |  |
|--------|--|
| 385.78 |  |
| 386.38 |  |

**Table S23.** The splitting of the lowest multiplet for Er<sup>III</sup> ion in **5** calculated by SINGLE\_ANISO together with g-values for each Kramers doublets and respective transition magnetic moments within each doublet quantifying probability for the quantum tunneling (QTM).

| $E$ (cm <sup>-1</sup> ) | $g_x$      | $g_y$      | $g_z$       | QTM                |
|-------------------------|------------|------------|-------------|--------------------|
| 0.000                   | 0.31315608 | 0.33349331 | 14.82083372 | 0.107774897346E+00 |
| 97.619                  | 8.35694787 | 6.72507544 | 3.13108396  | 0.193608422949E+01 |
| 130.457                 | 0.72730293 | 3.29655626 | 9.77961259  | 0.993834945299E+00 |
| 176.914                 | 0.23492617 | 0.40902150 | 16.17925224 | 0.111568895251E+00 |
| 249.069                 | 2.52211139 | 4.06041703 | 7.16757418  | 0.113433417502E+01 |
| 329.007                 | 6.51200728 | 5.15278151 | 1.61415230  | 0.120865753072E+01 |
| 341.394                 | 0.35611174 | 2.11315123 | 9.47471151  | 0.506106808100E+00 |
| 396.368                 | 1.07933538 | 1.55988696 | 10.03733769 | 0.446312003298E+00 |

**Table S24.** The splitting of the lowest multiplet for Yb<sup>III</sup> ion in **6** calculated by SINGLE\_ANISO together with g-values for each Kramers doublets and respective transition magnetic moments within each doublet quantifying probability for the quantum tunneling (QTM).

| $E$ (cm <sup>-1</sup> ) | $g_x$      | $g_y$      | $g_z$      | QTM                |
|-------------------------|------------|------------|------------|--------------------|
| 0.000                   | 0.02123513 | 1.19442061 | 6.34401083 | 0.202609289824E+00 |
| 43.958                  | 1.20406874 | 1.75191788 | 6.88060777 | 0.626743495420E+00 |
| 268.477                 | 0.85970490 | 2.61368353 | 5.58153431 | 0.802284465831E+00 |
| 305.071                 | 0.28883015 | 2.54863868 | 4.88332114 | 0.850362939362E+00 |

**Table S25.** The parameters derived for Ni<sup>II</sup> from theoretical calculations done for **1-7**.

| Complex          | CASSCF/NEVPT2 for Ni <sup>II</sup> ions |                                 |                       |                       |                       |
|------------------|-----------------------------------------|---------------------------------|-----------------------|-----------------------|-----------------------|
|                  | <i>D</i><br>(cm <sup>-1</sup> )         | <i>E</i><br>(cm <sup>-1</sup> ) | <i>g</i> <sub>x</sub> | <i>g</i> <sub>y</sub> | <i>g</i> <sub>z</sub> |
| <b>1</b> (Gd-Ni) | 13.45                                   | -2.61                           | 2.288                 | 2.254                 | 2.164                 |
| <b>2</b> (Tb-Ni) | 14.35                                   | -2.61                           | 2.286                 | 2.252                 | 2.155                 |
| <b>3</b> (Dy-Ni) | 13.96                                   | -2.42                           | 2.286                 | 2.255                 | 2.160                 |
| <b>4</b> (Ho-Ni) | 14.30                                   | -2.44                           | 2.291                 | 2.260                 | 2.162                 |
| <b>5</b> (Er-Ni) | 14.05                                   | -2.35                           | 2.289                 | 2.259                 | 2.162                 |
| <b>6</b> (Yb-Ni) | 14.33                                   | -2.40                           | 2.294                 | 2.263                 | 2.164                 |
| <b>7</b> (Y-Ni)  | 13.98                                   | -2.44                           | 2.290                 | 2.259                 | 2.163                 |

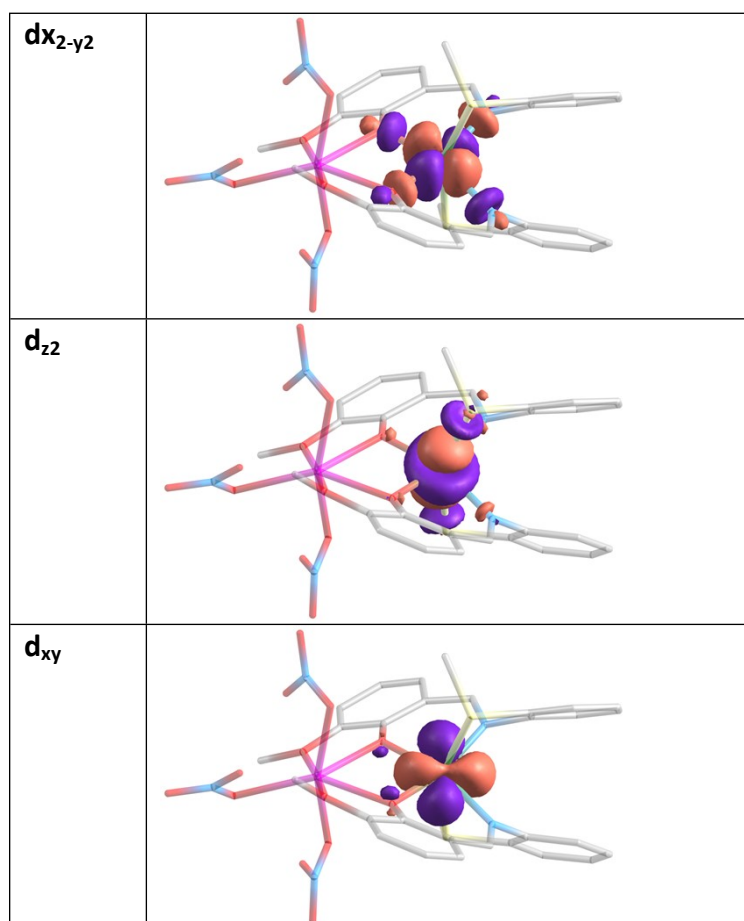

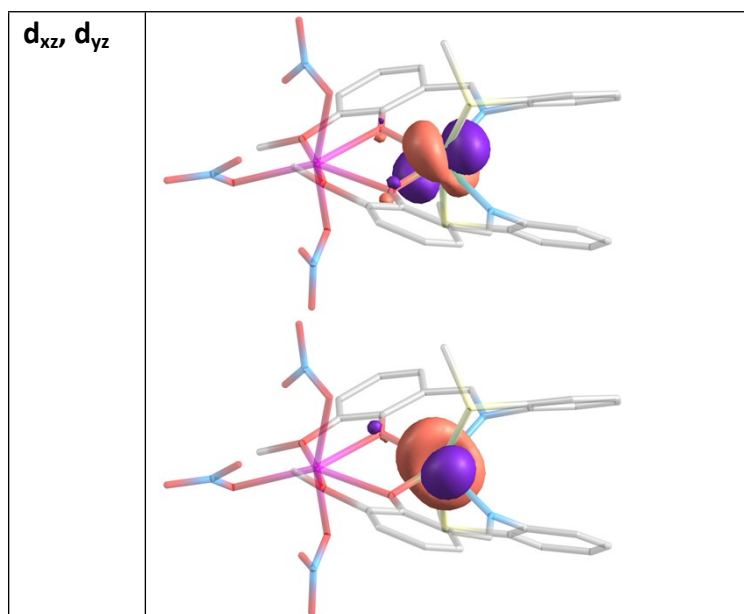

**Fig. S12** The AILFT d-orbitals for Ni<sup>II</sup> ion in **7** calculated with CASSCF/NEVPT2.

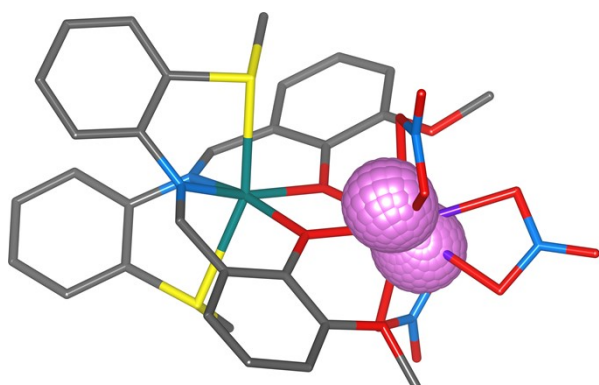

**Fig. S13** The molecular structure of **2** overlaid by the three dimensional molar magnetization of the respective Ln<sup>III</sup> ion calculated at  $T = 2$  K and  $B = 0.3$  T. The hydrogen atoms were omitted.

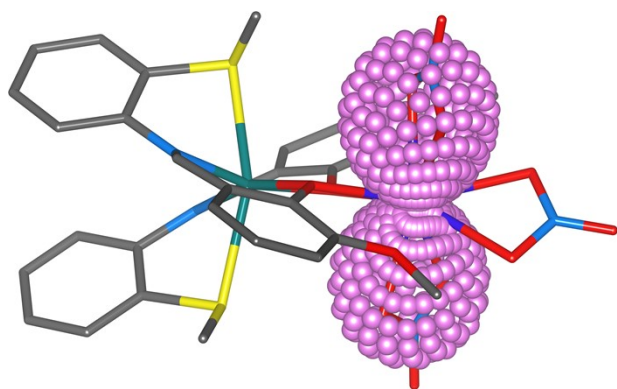

**Fig. S14** The molecular structure of **3** overlaid by the three dimensional molar magnetization of the respective Ln<sup>III</sup> ion calculated at  $T = 2$  K and  $B = 0.3$  T. The hydrogen atoms were omitted.

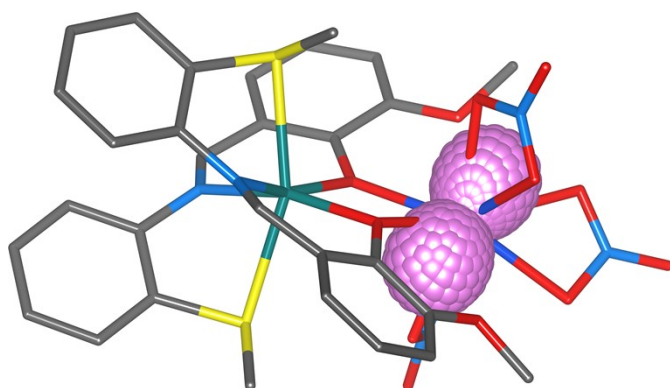

**Fig. S15** The molecular structure of **4** overlaid by the three dimensional molar magnetization of the respective Ln<sup>III</sup> ion calculated at  $T = 2$  K and  $B = 0.3$  T. The hydrogen atoms were omitted.

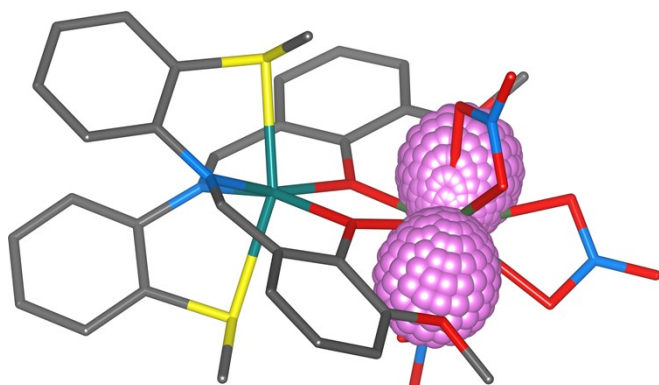

**Fig. S16** The molecular structure of **5** overlaid by the three dimensional molar magnetization of the respective Ln<sup>III</sup> ion calculated at  $T = 2$  K and  $B = 0.3$  T. The hydrogen atoms were omitted.



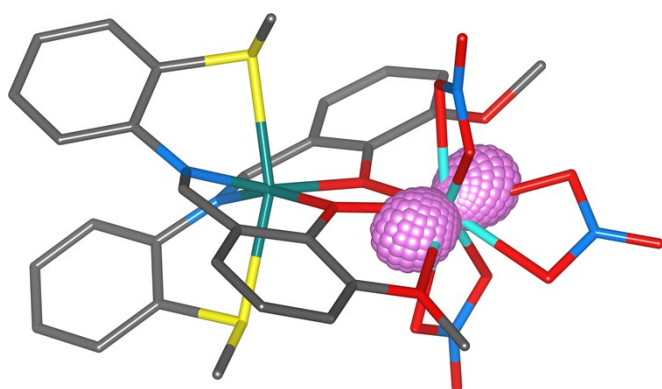

**Fig. S17** The molecular structure of **6** overlaid by the three dimensional molar magnetization of the respective  $\text{Ln}^{\text{III}}$  ion calculated at  $T = 2$  K and  $B = 0.3$  T. The hydrogen atoms were omitted.

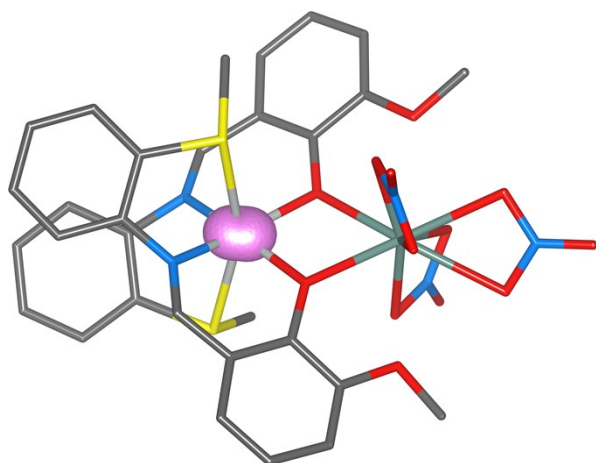

**Fig. S18** The molecular structure of **7** overlaid by the three dimensional molar magnetization of the respective  $\text{Ni}^{\text{II}}$  ion calculated at  $T = 2$  K and  $B = 0.3$  T. The hydrogen atoms were omitted.

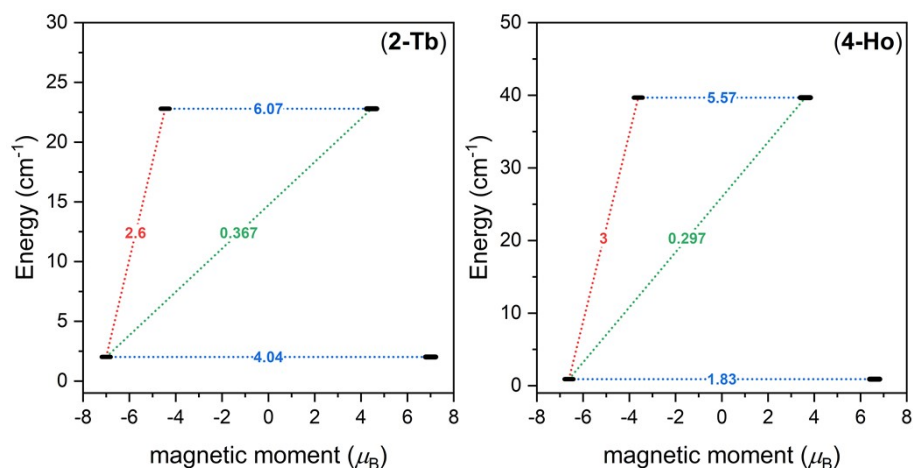

**Fig. S19** Magnetization blocking barrier of non-Kramers ions: Tb<sup>III</sup> of **2** and Ho<sup>III</sup> of **4** calculated using SINGLE\_ANISO from the respective CASSCF calculations, zoomed to the lowest energy levels. The numbers presented in the plot represent the corresponding matrix element of the transversal magnetic moment (for values larger than 0.1 an efficient relaxation mechanism is expected), the values colored in blue shows the tunnelling gap  $\Delta_{\text{tun}}$  (cm<sup>-1</sup>) of the indicated pseudo-doublets.

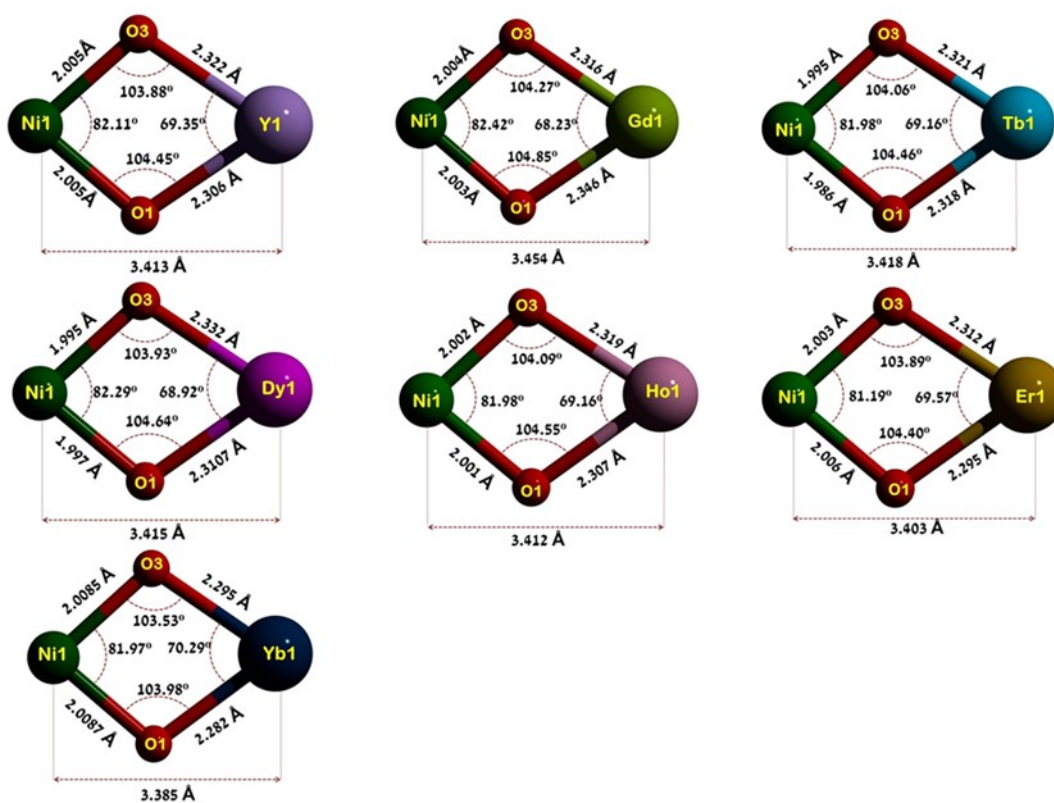

**Fig. S20** Variation in Ln...Ni separations, bridge bond distances, and angles within diamond cores in 1-7
